# Supplementary material for: Mechanistic Study on the Active Components of Bawei Longzuan Granules in Inhibiting Neovascularization
Source: Research Square preprint supplement (doi:10.21203/rs.3.rs-6266056/v1), 2025-05-30
Supplement: Supplementary file 1 [file Contorl-Model-compound4-compound5.pdf › supplementary materials/Flow cytometry/HUVEC/Contorl-Model-compound4-compound5.pdf]

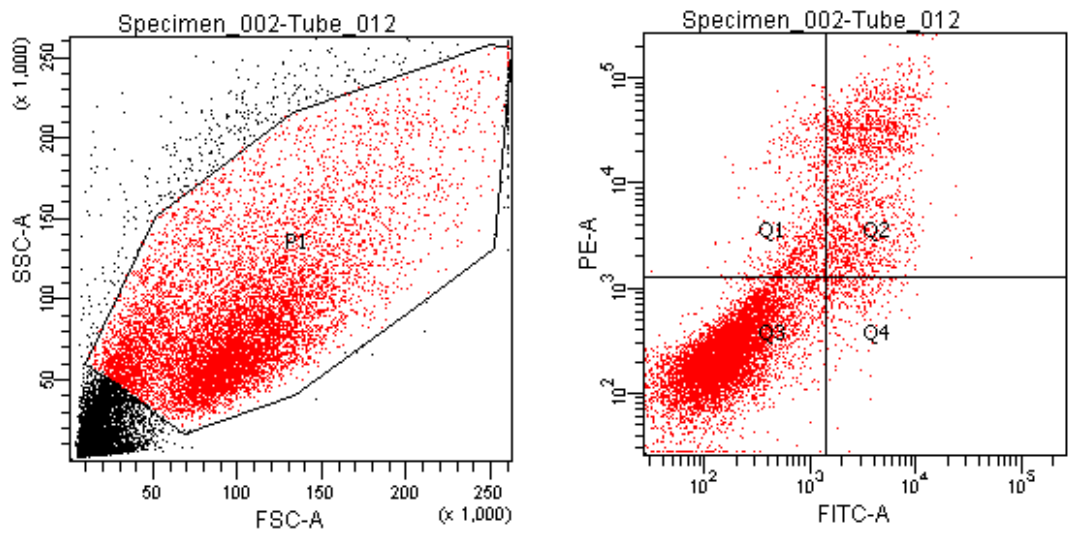

|                  |         |                                      |        |        |
|------------------|---------|--------------------------------------|--------|--------|
| Experiment Name: |         | HUVEC Ran                            |        |        |
| Specimen Name:   |         | Specimen_002                         |        |        |
| Tube Name:       |         | Tube_012                             |        |        |
| Record Date:     |         | Jun 19, 2024 11:20:07 AM             |        |        |
| \$OP:            |         | Administrator                        |        |        |
| GUID:            |         | 063653f3-155f-4585-af00-390999b6635b |        |        |
|                  |         |                                      | FITC-A | PE-A   |
| Population       | #Events | %Parent                              | Mean   | Mean   |
| ■ P1             | 10,000  | 45.8                                 | 957    | 4,520  |
| ▣ Q1             | 572     | 5.7                                  | 850    | 9,605  |
| ▣ Q2             | 1,589   | 15.9                                 | 4,209  | 23,505 |
| ▣ Q3             | 7,569   | 75.7                                 | 213    | 281    |
| ▣ Q4             | 270     | 2.7                                  | 2,891  | 843    |

FACSDiva Version 6.2

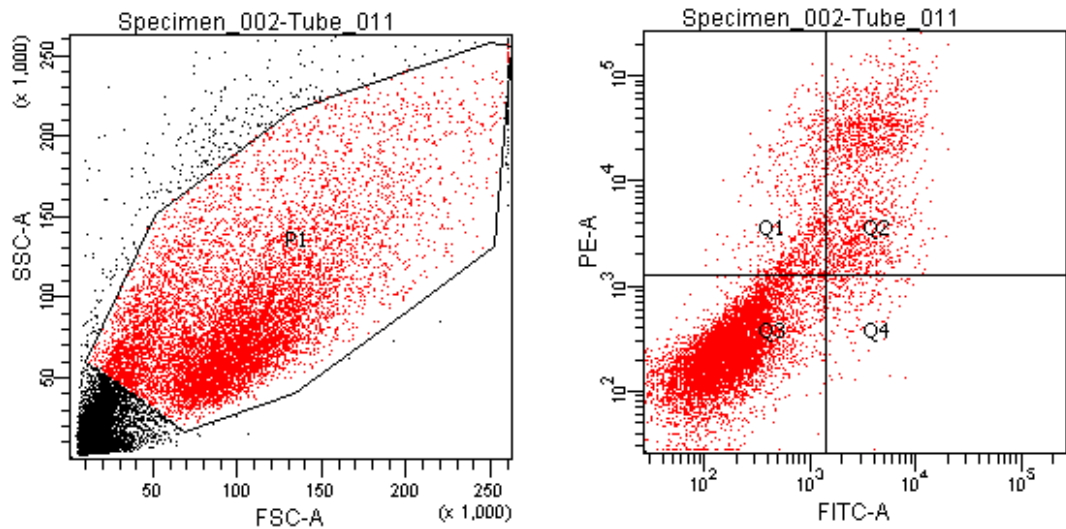

|                                            |         |         |                |              |
|--------------------------------------------|---------|---------|----------------|--------------|
| Experiment Name: HUVEC Ran                 |         |         |                |              |
| Specimen Name: Specimen_002                |         |         |                |              |
| Tube Name: Tube_011                        |         |         |                |              |
| Record Date: Jun 19, 2024 11:18:50 AM      |         |         |                |              |
| SOP: Administrator                         |         |         |                |              |
| GUID: 24616086-ea45-4db9-b691-7abf2b53e67c |         |         |                |              |
| Population                                 | #Events | %Parent | FITC-A<br>Mean | PE-A<br>Mean |
| ■ P1                                       | 10,000  | 45.7    | 964            | 4,745        |
| ☒ Q1                                       | 643     | 6.4     | 834            | 9,465        |
| ☒ Q2                                       | 1,611   | 16.1    | 4,253          | 24,252       |
| ☒ Q3                                       | 7,541   | 75.4    | 215            | 283          |
| ☒ Q4                                       | 205     | 2.1     | 3,093          | 806          |

FACSDiva Version 6.2

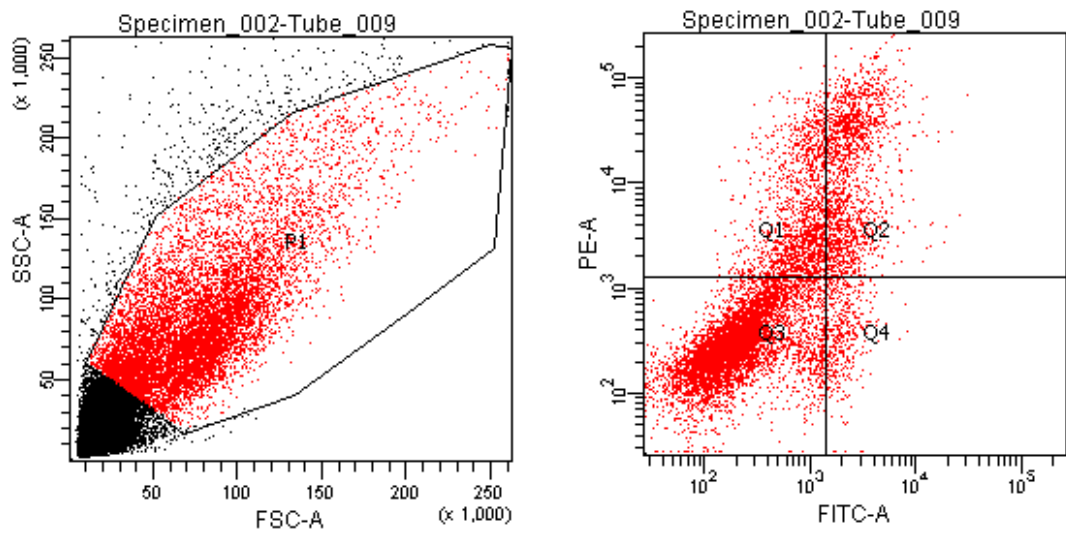

|                                            |         |         |                |              |
|--------------------------------------------|---------|---------|----------------|--------------|
| Experiment Name: HUVEC Ran                 |         |         |                |              |
| Specimen Name: Specimen_002                |         |         |                |              |
| Tube Name: Tube_009                        |         |         |                |              |
| Record Date: Jun 19, 2024 11:14:05 AM      |         |         |                |              |
| \$OP: Administrator                        |         |         |                |              |
| GUID: 25e55652-73f2-4062-bfc1-4d27c97c567f |         |         |                |              |
| Population                                 | #Events | %Parent | FITC-A<br>Mean | PE-A<br>Mean |
| ■ P1                                       | 10,000  | 27.5    | 900            | 5,918        |
| ☒ Q1                                       | 1,457   | 14.6    | 839            | 9,451        |
| ☒ Q2                                       | 1,682   | 16.8    | 2,910          | 25,589       |
| ☒ Q3                                       | 6,363   | 63.6    | 282            | 336          |
| ☒ Q4                                       | 498     | 5.0     | 2,186          | 469          |

FACSDiva Version 6.2

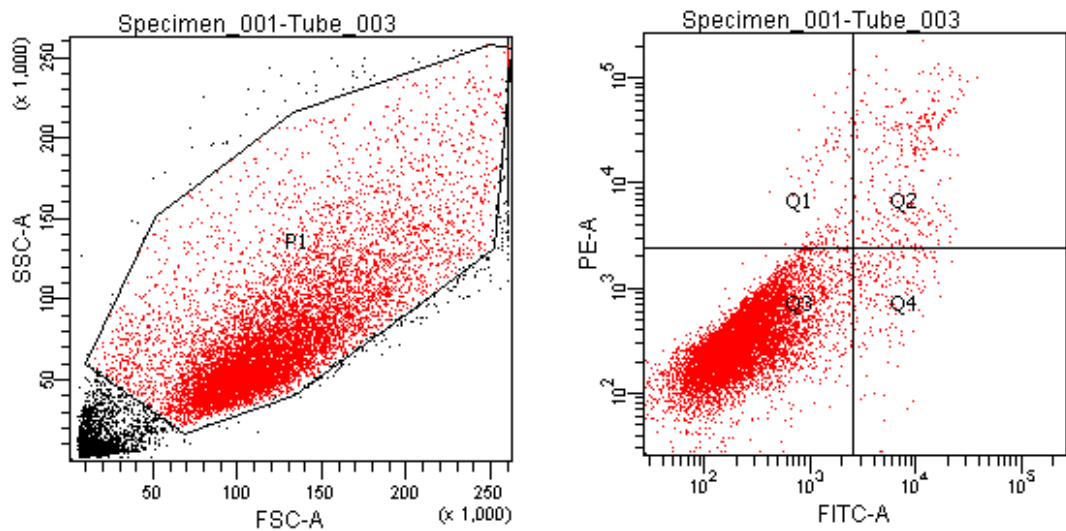

|                                            |         |         |             |           |
|--------------------------------------------|---------|---------|-------------|-----------|
| Experiment Name: HUVEC Ran                 |         |         |             |           |
| Specimen Name: Specimen_001                |         |         |             |           |
| Tube Name: Tube_003                        |         |         |             |           |
| Record Date: Jun 14, 2024 11:31:13 AM      |         |         |             |           |
| SOP: Administrator                         |         |         |             |           |
| GUID: 1a4c3b36-117a-4751-b299-e05d2f580077 |         |         |             |           |
| Population                                 | #Events | %Parent | FITC-A Mean | PE-A Mean |
| ■ P1                                       | 10,168  | 69.0    | 761         | 1,393     |
| ▣ Q1                                       | 104     | 1.0     | 1,493       | 13,689    |
| ▣ Q2                                       | 336     | 3.3     | 10,341      | 27,084    |
| ▣ Q3                                       | 9,513   | 93.6    | 292         | 357       |
| ▣ Q4                                       | 215     | 2.1     | 6,156       | 1,136     |

FACSDiva Version 6.2

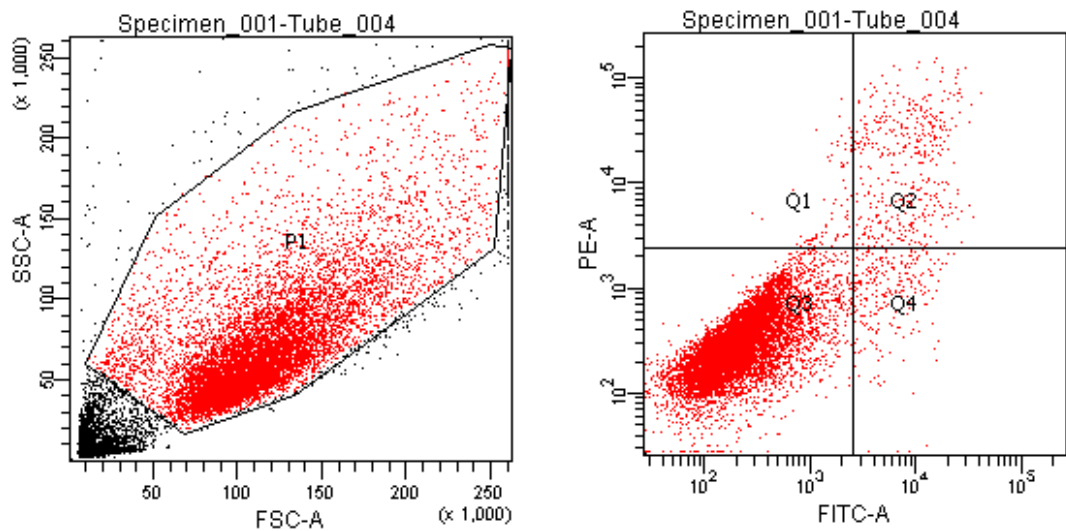

Experiment Name: HUVEC Ran  
Specimen Name: Specimen\_001  
Tube Name: Tube\_004  
Record Date: Jun 14, 2024 11:34:49 AM  
\$OP: Administrator  
GUID: b40b6753-fb4c-4707-b708-107027eb8941

| Population                                                                             | #Events | %Parent | FITC-A Mean | PE-A Mean |
|----------------------------------------------------------------------------------------|---------|---------|-------------|-----------|
|  P1 | 10,178  | 65.5    | 904         | 1,512     |
|  Q1 | 66      | 0.6     | 1,637       | 10,039    |
|  Q2 | 439     | 4.3     | 10,501      | 25,857    |
|  Q3 | 9,402   | 92.4    | 285         | 329       |
|  Q4 | 271     | 2.7     | 6,655       | 1,028     |

FACSDiva Version 6.2

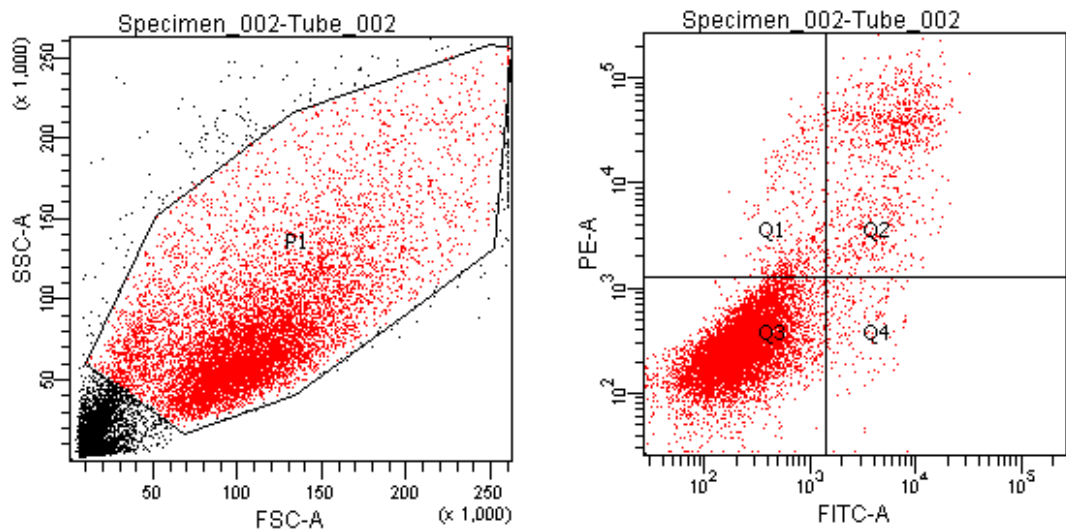

|                  |         |                                      |        |        |
|------------------|---------|--------------------------------------|--------|--------|
| Experiment Name: |         | HUVEC Ran                            |        |        |
| Specimen Name:   |         | Specimen_002                         |        |        |
| Tube Name:       |         | Tube_002                             |        |        |
| Record Date:     |         | Jun 19, 2024 10:55:14 AM             |        |        |
| \$OP:            |         | Administrator                        |        |        |
| GUID:            |         | 70daeb2d-7e40-4563-a4ac-5816d818a50e |        |        |
|                  |         |                                      | FITC-A | PE-A   |
| Population       | #Events | %Parent                              | Mean   | Mean   |
| <div></div> P1   | 10,000  | 56.5                                 | 957    | 3,827  |
| <div></div> Q1   | 358     | 3.6                                  | 755    | 8,558  |
| <div></div> Q2   | 979     | 9.8                                  | 6,555  | 33,239 |
| <div></div> Q3   | 8,482   | 84.8                                 | 270    | 303    |
| <div></div> Q4   | 181     | 1.8                                  | 3,255  | 547    |

FACSDiva Version 6.2

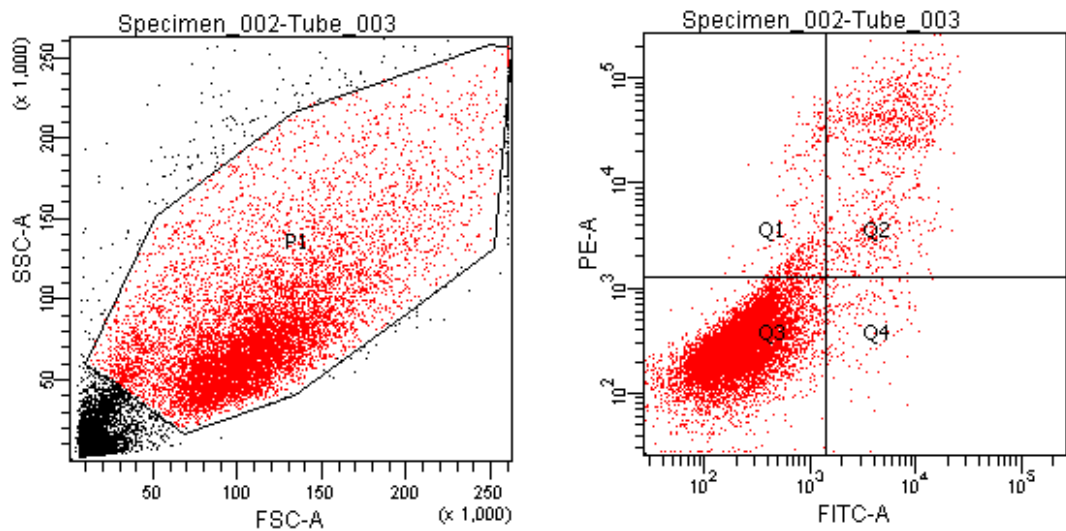

|                                            |         |         |                |              |
|--------------------------------------------|---------|---------|----------------|--------------|
| Experiment Name: HUVEC Ran                 |         |         |                |              |
| Specimen Name: Specimen_002                |         |         |                |              |
| Tube Name: Tube_003                        |         |         |                |              |
| Record Date: Jun 19, 2024 10:56:35 AM      |         |         |                |              |
| \$OP: Administrator                        |         |         |                |              |
| GUID: 36606ebb-26f3-4e70-95bf-19e3088c55bc |         |         |                |              |
| Population                                 | #Events | %Parent | FITC-A<br>Mean | PE-A<br>Mean |
| ■ P1                                       | 10,000  | 55.9    | 975            | 4,004        |
| ▣ Q1                                       | 305     | 3.0     | 868            | 8,899        |
| ▣ Q2                                       | 966     | 9.7     | 6,747          | 35,825       |
| ▣ Q3                                       | 8,556   | 85.6    | 276            | 306          |
| ▣ Q4                                       | 173     | 1.7     | 3,498          | 604          |

## FACSDiva Version 6.2

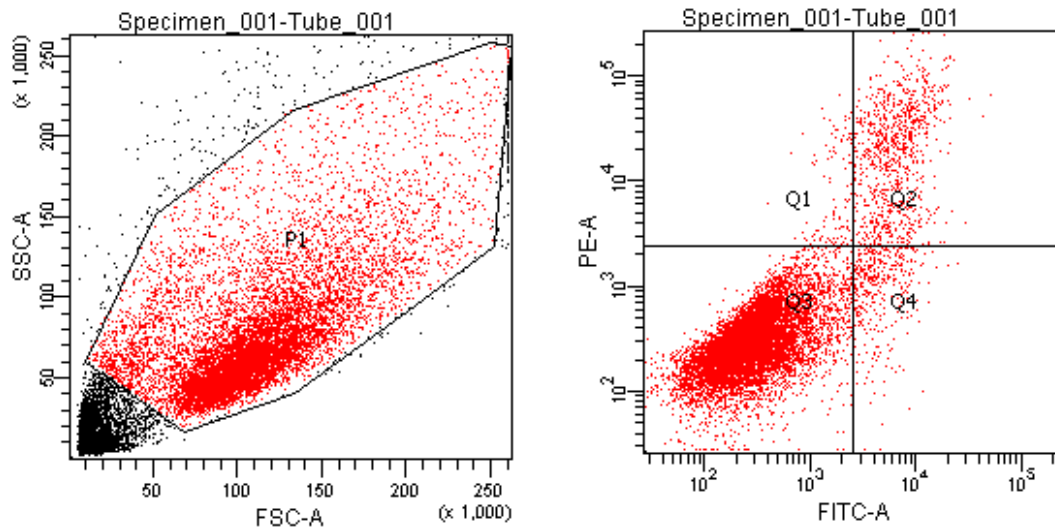

Experiment Name: HUVEC Ran  
 Specimen Name: Specimen\_001  
 Tube Name: Tube\_001  
 Record Date: Jun 14, 2024 11:23:55 AM  
 \$OP: Administrator  
 GUID: 0f5d3a60-7536-4e89-a328-a20b7b32ceef

| Population | #Events | %Parent | FITC-A<br>Mean | PE-A<br>Mean |
|------------|---------|---------|----------------|--------------|
| ■ P1       | 10,375  | 63.3    | 1,202          | 3,062        |
| ☒ Q1       | 95      | 0.9     | 1,733          | 12,714       |
| ☒ Q2       | 872     | 8.4     | 7,832          | 31,101       |
| ☒ Q3       | 9,021   | 86.9    | 386            | 332          |
| ☒ Q4       | 387     | 3.7     | 5,147          | 1,150        |



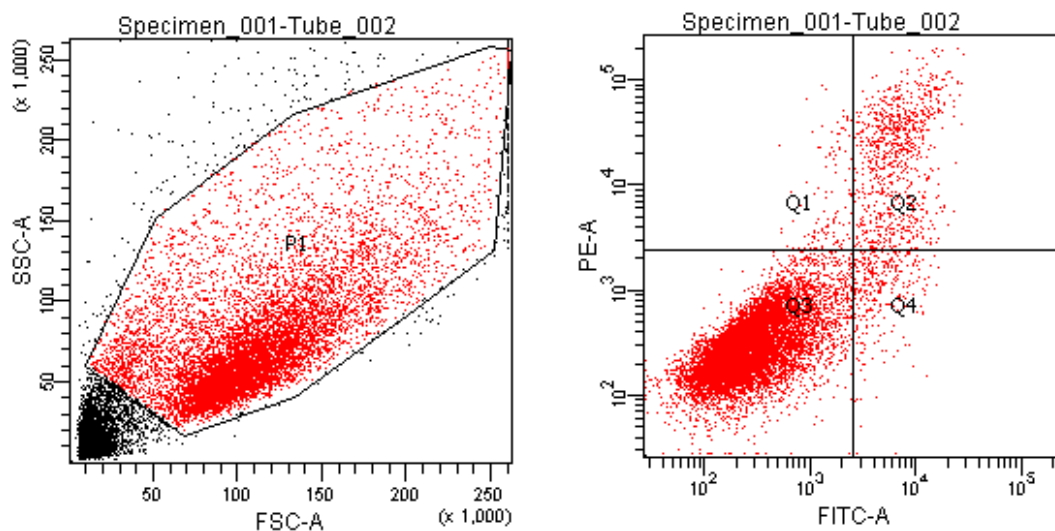

Experiment Name: HUVEC Ran  
 Specimen Name: Specimen\_001  
 Tube Name: Tube\_002  
 Record Date: Jun 14, 2024 11:27:40 AM  
 \$OP: Administrator  
 GUID: da66e167-cbcf-41cf-92aa-836285d11ba4

| Population | #Events | %Parent | FITC-A<br>Mean | PE-A<br>Mean |
|------------|---------|---------|----------------|--------------|
| ■ P1       | 10,153  | 64.0    | 1,219          | 3,062        |
| ☒ Q1       | 106     | 1.0     | 1,593          | 14,180       |
| ☒ Q2       | 871     | 8.6     | 8,033          | 30,043       |
| ☒ Q3       | 8,825   | 86.9    | 385            | 341          |
| ☒ Q4       | 351     | 3.5     | 5,173          | 1,175        |

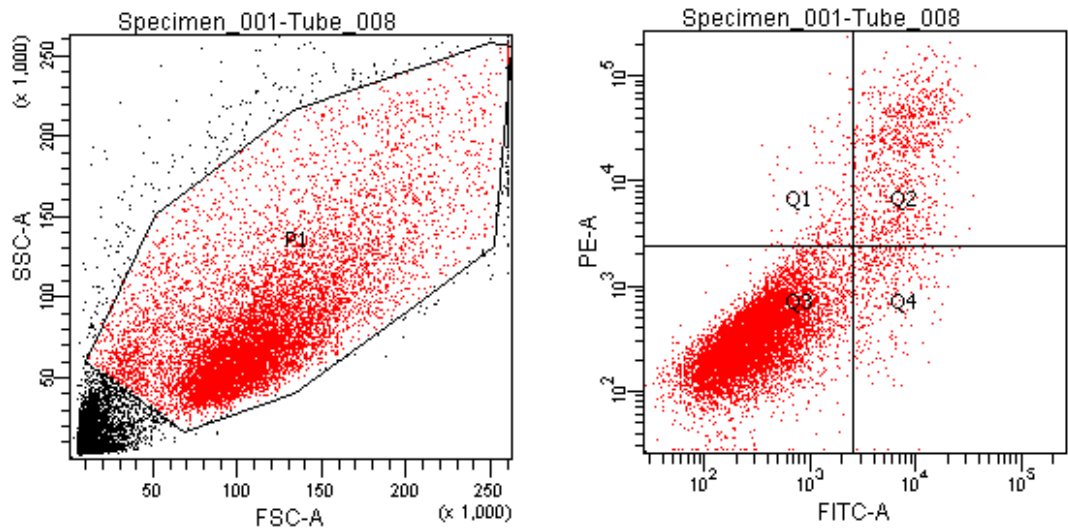

|                  |         |                                      |        |        |
|------------------|---------|--------------------------------------|--------|--------|
| Experiment Name: |         | HUVEC Ran                            |        |        |
| Specimen Name:   |         | Specimen_001                         |        |        |
| Tube Name:       |         | Tube_008                             |        |        |
| Record Date:     |         | Jun 14, 2024 11:48:26 AM             |        |        |
| \$OP:            |         | Administrator                        |        |        |
| GUID:            |         | fd58eb6d-5d92-45dc-9543-32efa1001f5b |        |        |
|                  |         |                                      | FITC-A | PE-A   |
| Population       | #Events | %Parent                              | Mean   | Mean   |
| ■ P1             | 10,000  | 64.2                                 | 1,400  | 3,181  |
| ☒ Q1             | 141     | 1.4                                  | 1,540  | 12,131 |
| ☒ Q2             | 911     | 9.1                                  | 9,165  | 29,124 |
| ☒ Q3             | 8,603   | 86.0                                 | 390    | 368    |
| ☒ Q4             | 345     | 3.4                                  | 6,006  | 1,152  |

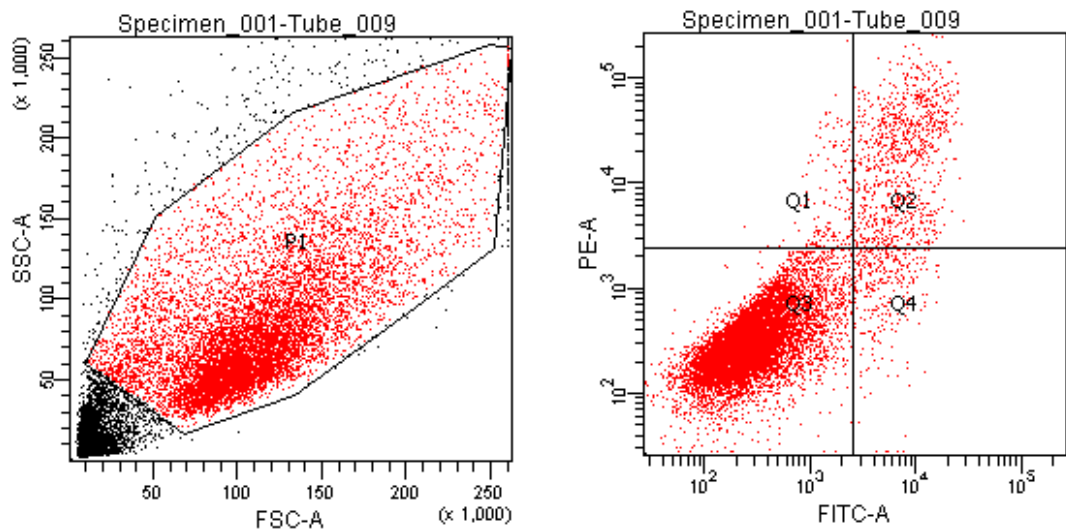

Experiment Name: HUVEC Ran  
Specimen Name: Specimen\_001  
Tube Name: Tube\_009  
Record Date: Jun 14, 2024 11:50:05 AM  
\$OP: Administrator  
GUID: f5f391d7-1d8c-48ce-9dd1-590853d7595e

| Population                                                                             | #Events | %Parent | FITC-A<br>Mean | PE-A<br>Mean |
|----------------------------------------------------------------------------------------|---------|---------|----------------|--------------|
|  P1 | 10,000  | 64.6    | 1,368          | 3,261        |
|  Q1 | 136     | 1.4     | 1,612          | 13,182       |
|  Q2 | 893     | 8.9     | 9,233          | 30,553       |
|  Q3 | 8,651   | 86.5    | 390            | 365          |
|  Q4 | 320     | 3.2     | 5,752          | 1,169        |

FACSDiva Version 6.2

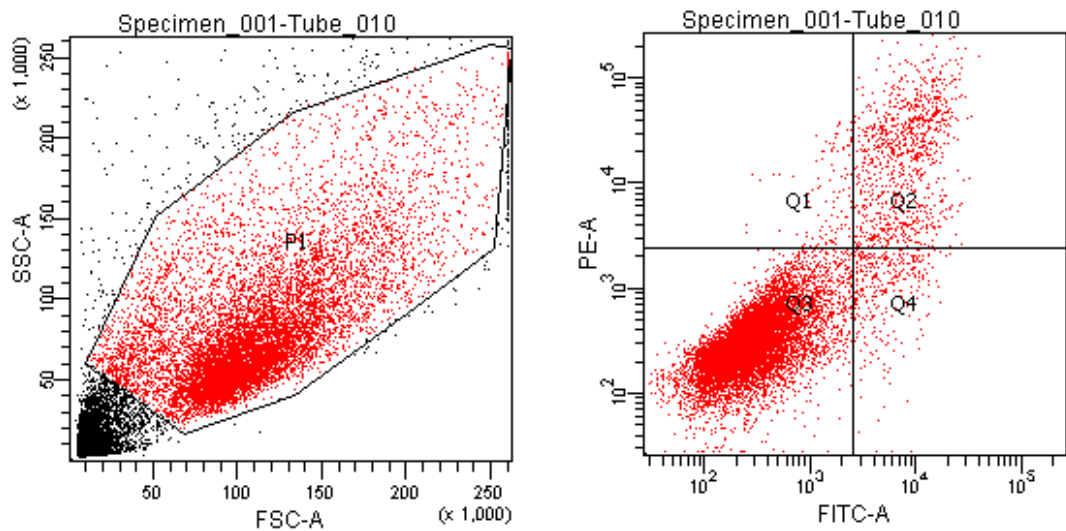

|                  |         |                                      |                |              |
|------------------|---------|--------------------------------------|----------------|--------------|
| Experiment Name: |         | HUVEC Ran                            |                |              |
| Specimen Name:   |         | Specimen_001                         |                |              |
| Tube Name:       |         | Tube_010                             |                |              |
| Record Date:     |         | Jun 14, 2024 11:52:00 AM             |                |              |
| \$OP:            |         | Administrator                        |                |              |
| GUID:            |         | 7c5c675f-43b0-4fa5-8d3e-8b0c40ed0fb7 |                |              |
|                  |         |                                      |                |              |
| Population       | #Events | %Parent                              | FITC-A<br>Mean | PE-A<br>Mean |
| ■ P1             | 10,000  | 63.2                                 | 1,523          | 3,425        |
| ☒ Q1             | 102     | 1.0                                  | 1,592          | 10,609       |
| ☒ Q2             | 970     | 9.7                                  | 9,801          | 30,663       |
| ☒ Q3             | 8,566   | 85.7                                 | 390            | 349          |
| ☒ Q4             | 362     | 3.6                                  | 6,123          | 1,201        |

FACSDiva Version 6.2

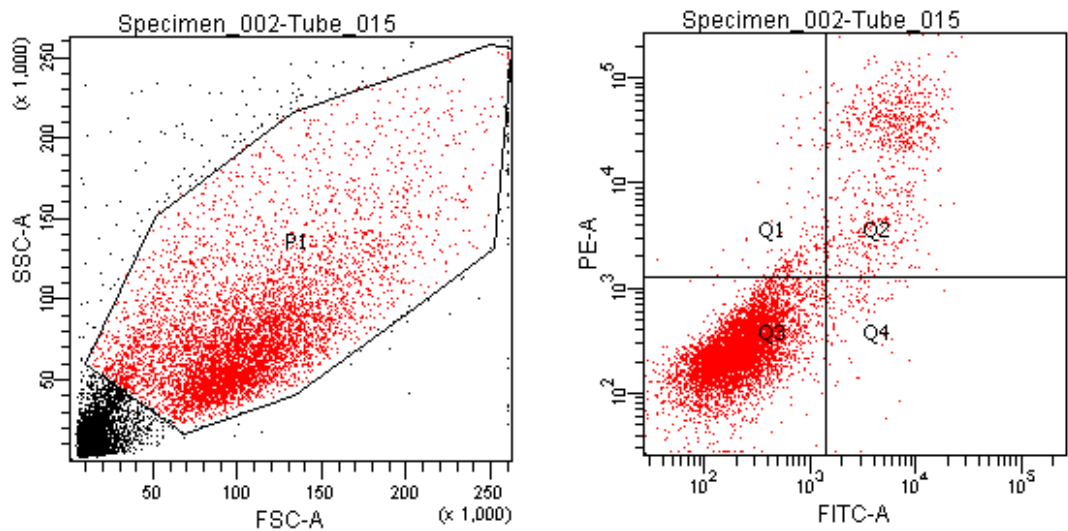

|                  |         |                                      |        |        |
|------------------|---------|--------------------------------------|--------|--------|
| Experiment Name: |         | HUVEC Ran                            |        |        |
| Specimen Name:   |         | Specimen_002                         |        |        |
| Tube Name:       |         | Tube_015                             |        |        |
| Record Date:     |         | Jun 19, 2024 11:28:18 AM             |        |        |
| \$OP:            |         | Administrator                        |        |        |
| GUID:            |         | 0a7d6759-544f-4da2-8f07-3634a6e75454 |        |        |
|                  |         |                                      | FITC-A | PE-A   |
| Population       | #Events | %Parent                              | Mean   | Mean   |
| ■ P1             | 6,526   | 48.6                                 | 1,085  | 4,278  |
| ☒ Q1             | 145     | 2.2                                  | 806    | 7,959  |
| ☒ Q2             | 761     | 11.7                                 | 6,726  | 32,950 |
| ☒ Q3             | 5,511   | 84.4                                 | 263    | 294    |
| ☒ Q4             | 109     | 1.7                                  | 3,596  | 674    |

FACSDiva Version 6.2

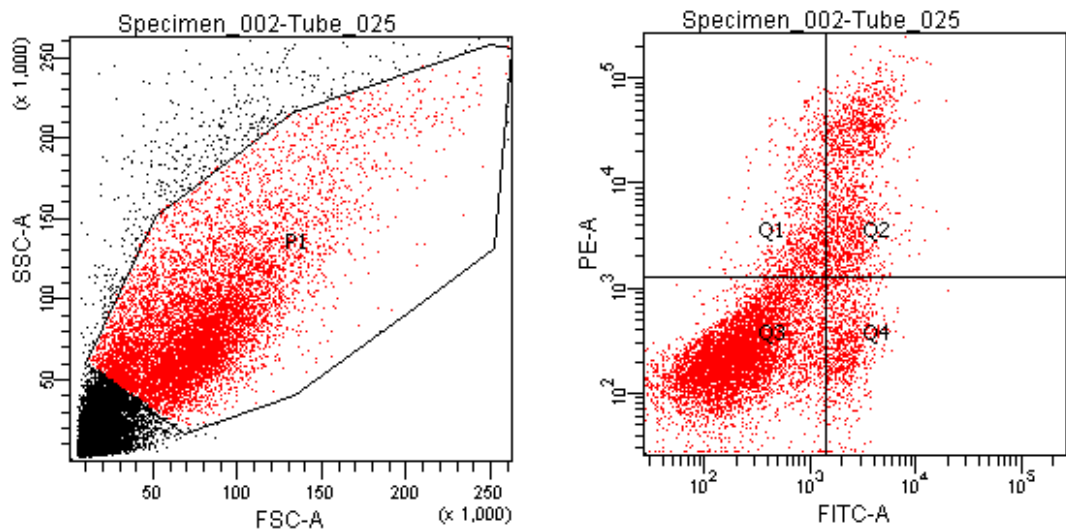

|                                            |         |         |             |           |
|--------------------------------------------|---------|---------|-------------|-----------|
| Experiment Name: HUVEC Ran                 |         |         |             |           |
| Specimen Name: Specimen_002                |         |         |             |           |
| Tube Name: Tube_025                        |         |         |             |           |
| Record Date: Jun 19, 2024 12:08:08 PM      |         |         |             |           |
| SOP: Administrator                         |         |         |             |           |
| GUID: 54918435-dac8-4ff0-b9c1-f5b1c352b120 |         |         |             |           |
| Population                                 | #Events | %Parent | FITC-A Mean | PE-A Mean |
| ■ P1                                       | 10,000  | 31.7    | 955         | 4,300     |
| ▣ Q1                                       | 732     | 7.3     | 890         | 8,299     |
| ▣ Q2                                       | 1,533   | 15.3    | 3,052       | 22,593    |
| ▣ Q3                                       | 6,824   | 68.2    | 292         | 280       |
| ▣ Q4                                       | 911     | 9.1     | 2,445       | 415       |

FACSDiva Version 6.2

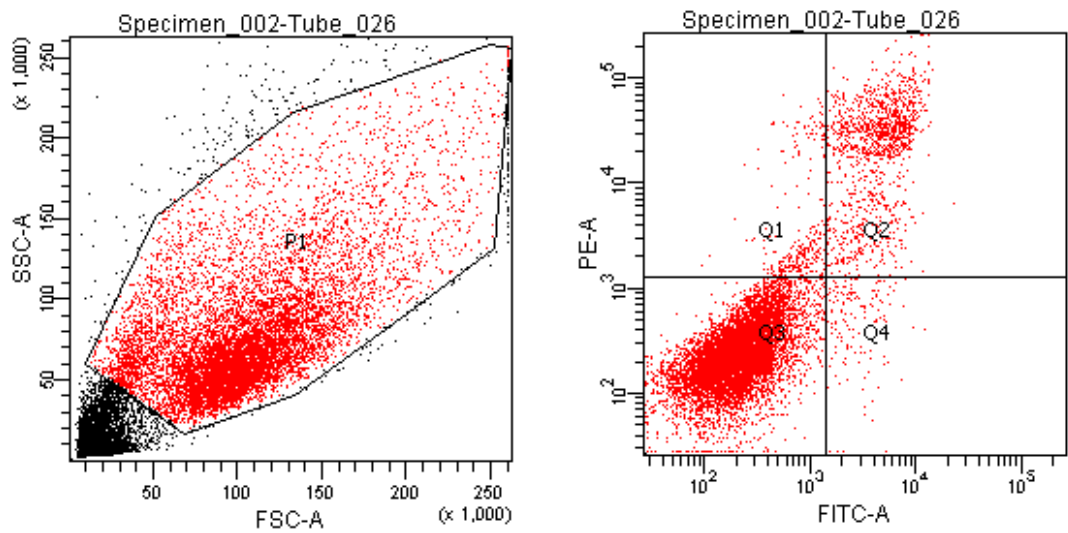

|                                            |         |         |                |              |
|--------------------------------------------|---------|---------|----------------|--------------|
| Experiment Name: HUVEC Ran                 |         |         |                |              |
| Specimen Name: Specimen_002                |         |         |                |              |
| Tube Name: Tube_026                        |         |         |                |              |
| Record Date: Jun 19, 2024 12:09:34 PM      |         |         |                |              |
| SOP: Administrator                         |         |         |                |              |
| GUID: 6f6d102a-98f9-4686-a041-7186b0a254e3 |         |         |                |              |
| Population                                 | #Events | %Parent | FITC-A<br>Mean | PE-A<br>Mean |
| ■ P1                                       | 10,000  | 50.8    | 929            | 4,517        |
| ☒ Q1                                       | 261     | 2.6     | 852            | 9,064        |
| ☒ Q2                                       | 1,242   | 12.4    | 5,198          | 32,558       |
| ☒ Q3                                       | 8,337   | 83.4    | 254            | 272          |
| ☒ Q4                                       | 160     | 1.6     | 3,090          | 588          |

FACSDiva Version 6.2

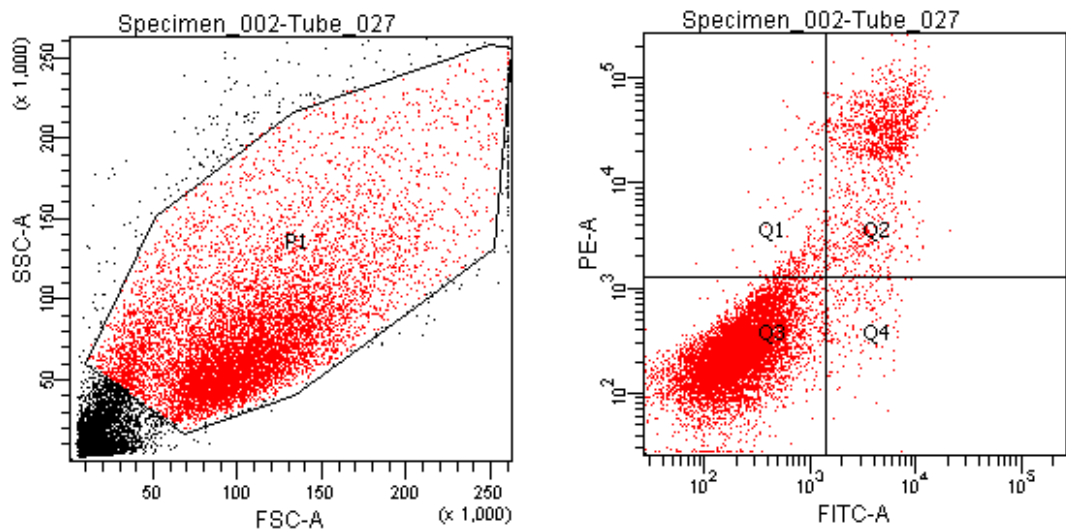

|                                            |         |         |                |              |
|--------------------------------------------|---------|---------|----------------|--------------|
| Experiment Name: HUVEC Ran                 |         |         |                |              |
| Specimen Name: Specimen_002                |         |         |                |              |
| Tube Name: Tube_027                        |         |         |                |              |
| Record Date: Jun 19, 2024 12:10:50 PM      |         |         |                |              |
| SOP: Administrator                         |         |         |                |              |
| GUID: 4dce9315-ee5d-4ca3-93dc-52bb7f48a8f2 |         |         |                |              |
| Population                                 | #Events | %Parent | FITC-A<br>Mean | PE-A<br>Mean |
| ■ P1                                       | 10,000  | 48.9    | 988            | 4,615        |
| ▣ Q1                                       | 212     | 2.1     | 853            | 7,450        |
| ▣ Q2                                       | 1,324   | 13.2    | 5,263          | 31,842       |
| ▣ Q3                                       | 8,286   | 82.9    | 260            | 279          |
| ▣ Q4                                       | 178     | 1.8     | 3,240          | 607          |
