# Supplementary material for: Mechanistic Study on the Active Components of Bawei Longzuan Granules in Inhibiting Neovascularization
Source: Research Square preprint supplement (doi:10.21203/rs.3.rs-6266056/v1), 2025-05-30
Supplement: Supplementary file 1 [file transwell huvec.xlsx]

## Sheet: Sheet1
正常组							甘草素
c:1/3 - transwell huvec15	298	142612	478.562	6.275	0		c:1/3 - transwell huvec17	220	103350	469.773	4.547	4.467
c:1/3 - transwell huvec29	318	191805	603.162	8.439	73.031		c:1/3 - transwell huvec23	256	121872	476.062	5.362	0
c:1/3 - Image003	188	107162	570.011	4.715	7.993		c:1/3 - transwell huvec24	292	112517	385.331	4.951	36.047
模型组							柚皮素
c:1/3 - transwell huvec	456	298483	654.568	13.133	7.963		c:1/3 - transwell huvec13	155	54731.5	353.107	2.408	11.026
c:1/3 - transwell huvec5	352	300316	853.17	13.214	11.892		c:1/3 - transwell huvec16	148	57032.4	385.354	2.509	0
c:1/3 - transwell huvec6	414	253325	611.896	11.146	14.683		c:1/3 - transwell huvec18	179	75866.9	423.837	3.338	0
对照组							木犀草素
c:1/3 - Image001	251	127696	508.751	5.618	6.155		c:1/3 - transwell huvec8	169	75206.6	445.009	3.309	0
c:1/3 - Image002	156	71215.1	456.507	3.133	7.641		c:1/3 - transwell huvec19	225	94083.6	418.149	4.14	0
c:1/3 - Image004	236	133512	565.727	5.874	7.11		c:1/3 - transwell huvec22	254	108967	429.005	4.794	13.023
		**	*	**	**
正常组	模型组	对照组	甘草素	柚皮素	木犀草素
298	456	251	220	155	169
318	352	156	256	148	225
188	414	236	292	179	254
268	407.333	214.333	256	160.667	216	均值
57.1548	42.7187	41.7	29.3939	13.2749	35.2798	标准差
	分组	剂量	迁移数
	正常组		268.00±57.15
	模型组		407.33±42.72
	对照组		214.33±41.70
	甘草素		256.00±29.39
	柚皮素		160.67±13.27
	木犀草素		216.00±35.28
