# Supplementary material for: Mechanistic Study on the Active Components of Bawei Longzuan Granules in Inhibiting Neovascularization
Source: Research Square preprint supplement (doi:10.21203/rs.3.rs-6266056/v1), 2025-05-30
Supplement: Supplementary file 2 [file compound1-compound2-compound3.pdf › supplementary materials/Flow cytometry/HUVEC/compound1-compound2-compound3.pdf]

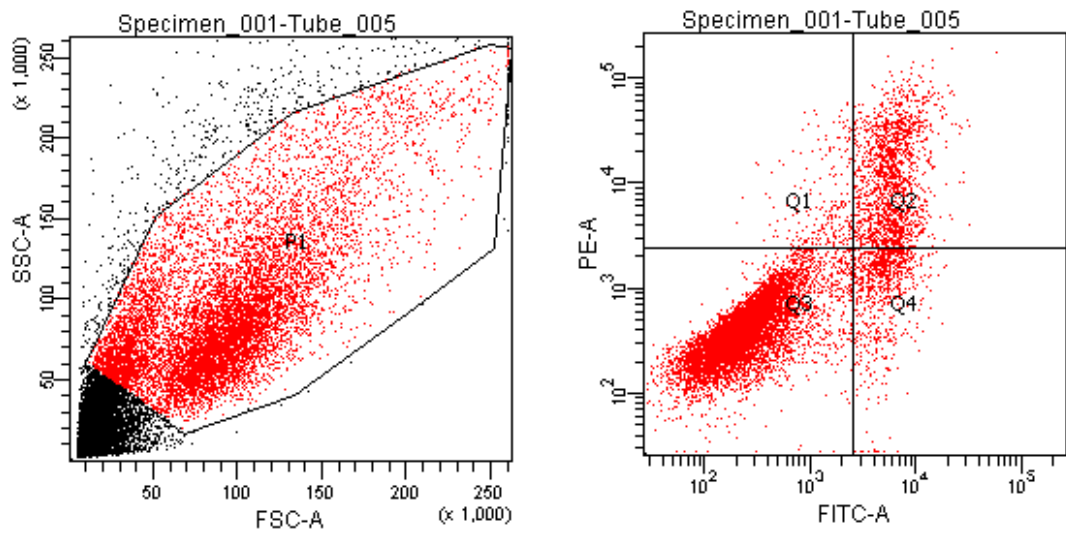

|                  |         |                                       |        |        |
|------------------|---------|---------------------------------------|--------|--------|
| Experiment Name: |         | HUVEC Ran                             |        |        |
| Specimen Name:   |         | Specimen_001                          |        |        |
| Tube Name:       |         | Tube_005                              |        |        |
| Record Date:     |         | Jun 14, 2024 11:38:34 AM              |        |        |
| \$OP:            |         | Administrator                         |        |        |
| GUID:            |         | bb1fb0a3-4361-431b-9f69-463eaaad1509c |        |        |
|                  |         |                                       | FITC-A | PE-A   |
| Population       | #Events | %Parent                               | Mean   | Mean   |
| ■ P1             | 10,441  | 39.7                                  | 1,788  | 3,475  |
| ☒ Q1             | 215     | 2.1                                   | 1,493  | 9,797  |
| ☒ Q2             | 1,602   | 15.3                                  | 6,905  | 18,520 |
| ☒ Q3             | 7,759   | 74.3                                  | 329    | 440    |
| ☒ Q4             | 865     | 8.3                                   | 5,480  | 1,262  |

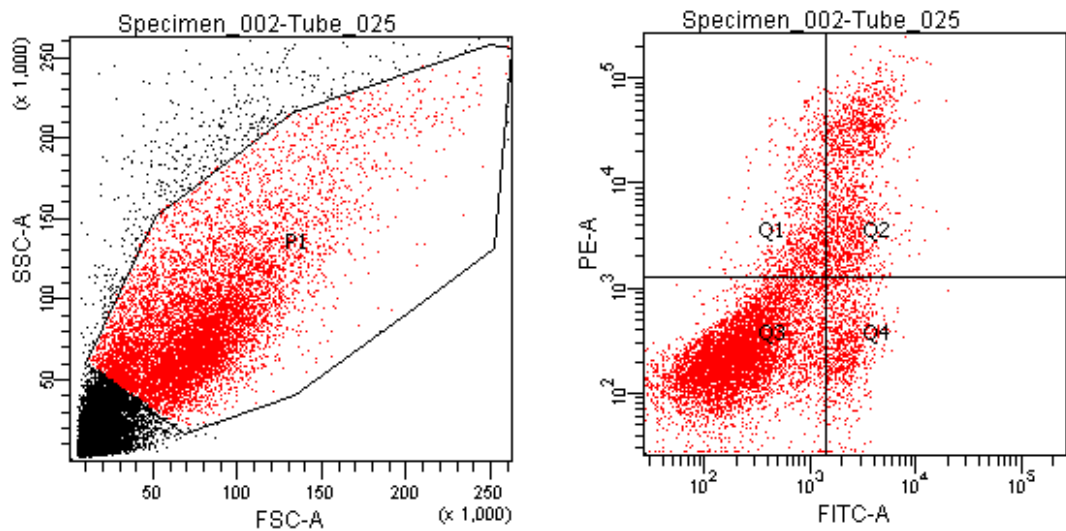

|                                            |         |         |                |              |
|--------------------------------------------|---------|---------|----------------|--------------|
| Experiment Name: HUVEC Ran                 |         |         |                |              |
| Specimen Name: Specimen_002                |         |         |                |              |
| Tube Name: Tube_025                        |         |         |                |              |
| Record Date: Jun 19, 2024 12:08:08 PM      |         |         |                |              |
| \$OP: Administrator                        |         |         |                |              |
| GUID: 54918435-dac8-4ff0-b9c1-f5b1c352b120 |         |         |                |              |
| Population                                 | #Events | %Parent | FITC-A<br>Mean | PE-A<br>Mean |
| ■ P1                                       | 10,000  | 31.7    | 955            | 4,300        |
| ☒ Q1                                       | 732     | 7.3     | 890            | 8,299        |
| ☒ Q2                                       | 1,533   | 15.3    | 3,052          | 22,593       |
| ☒ Q3                                       | 6,824   | 68.2    | 292            | 280          |
| ☒ Q4                                       | 911     | 9.1     | 2,445          | 415          |

FACSDiva Version 6.2

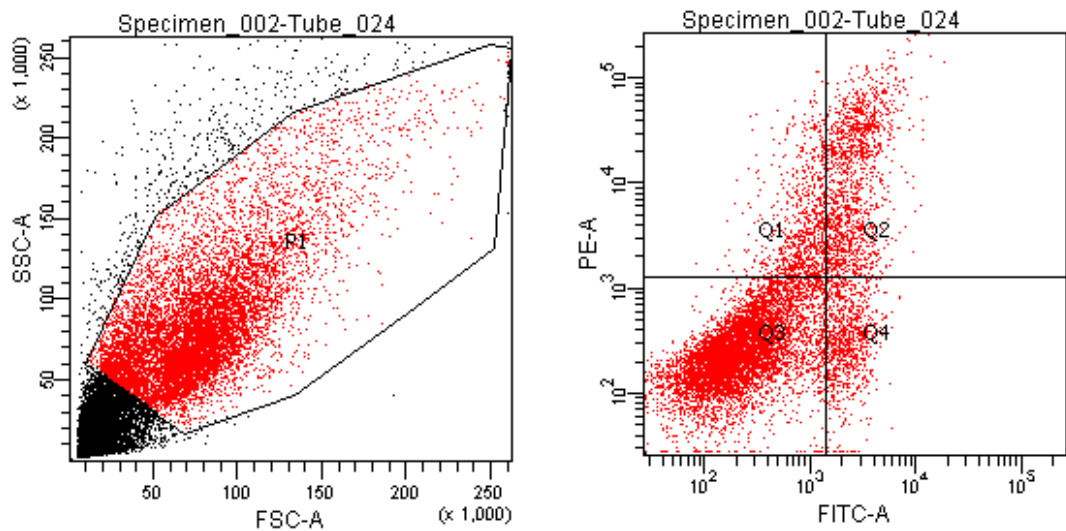

|                  |         |                                      |        |        |
|------------------|---------|--------------------------------------|--------|--------|
| Experiment Name: |         | HUVEC Ran                            |        |        |
| Specimen Name:   |         | Specimen_002                         |        |        |
| Tube Name:       |         | Tube_024                             |        |        |
| Record Date:     |         | Jun 19, 2024 12:06:27 PM             |        |        |
| \$OP:            |         | Administrator                        |        |        |
| GUID:            |         | 57eb8fc3-11fc-431f-8694-0f54aee18112 |        |        |
|                  |         |                                      | FITC-A | PE-A   |
| Population       | #Events | %Parent                              | Mean   | Mean   |
| <div></div> P1   | 10,000  | 31.8                                 | 952    | 4,275  |
| <div></div> Q1   | 760     | 7.6                                  | 886    | 7,617  |
| <div></div> Q2   | 1,548   | 15.5                                 | 3,017  | 22,370 |
| <div></div> Q3   | 6,792   | 67.9                                 | 296    | 290    |
| <div></div> Q4   | 900     | 9.0                                  | 2,404  | 408    |

FACSDiva Version 6.2

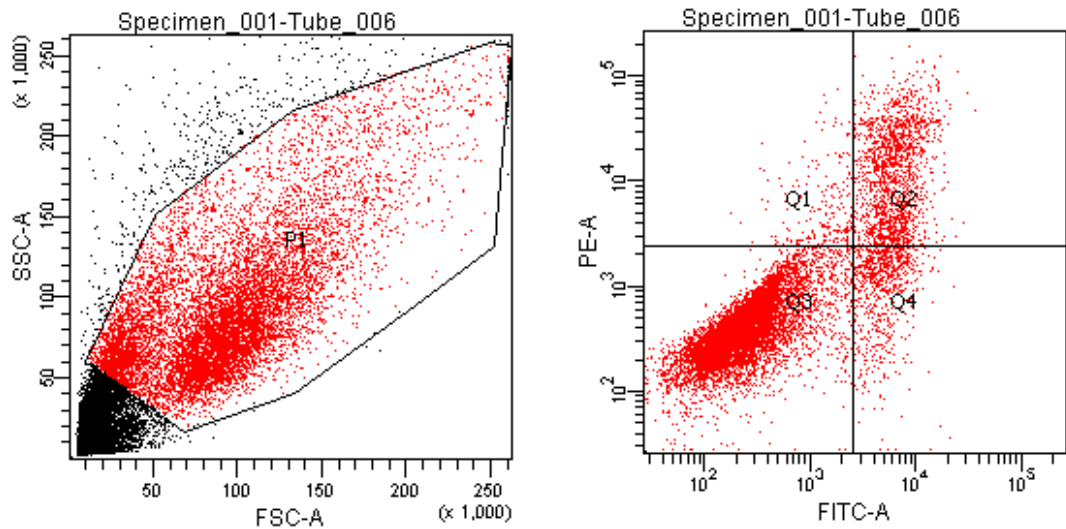

|                  |         |                                      |        |        |
|------------------|---------|--------------------------------------|--------|--------|
| Experiment Name: |         | HUVEC Ran                            |        |        |
| Specimen Name:   |         | Specimen_001                         |        |        |
| Tube Name:       |         | Tube_006                             |        |        |
| Record Date:     |         | Jun 14, 2024 11:40:15 AM             |        |        |
| \$OP:            |         | Administrator                        |        |        |
| GUID:            |         | 31c48063-61ab-4039-933a-bf01cb72a5d1 |        |        |
|                  |         |                                      | FITC-A | PE-A   |
| Population       | #Events | %Parent                              | Mean   | Mean   |
| ■ P1             | 10,417  | 40.5                                 | 1,842  | 3,570  |
| ☒ Q1             | 197     | 1.9                                  | 1,468  | 8,629  |
| ☒ Q2             | 1,640   | 15.7                                 | 7,235  | 18,973 |
| ☒ Q3             | 7,760   | 74.5                                 | 330    | 437    |
| ☒ Q4             | 820     | 7.9                                  | 5,459  | 1,199  |

FACSDiva Version 6.2

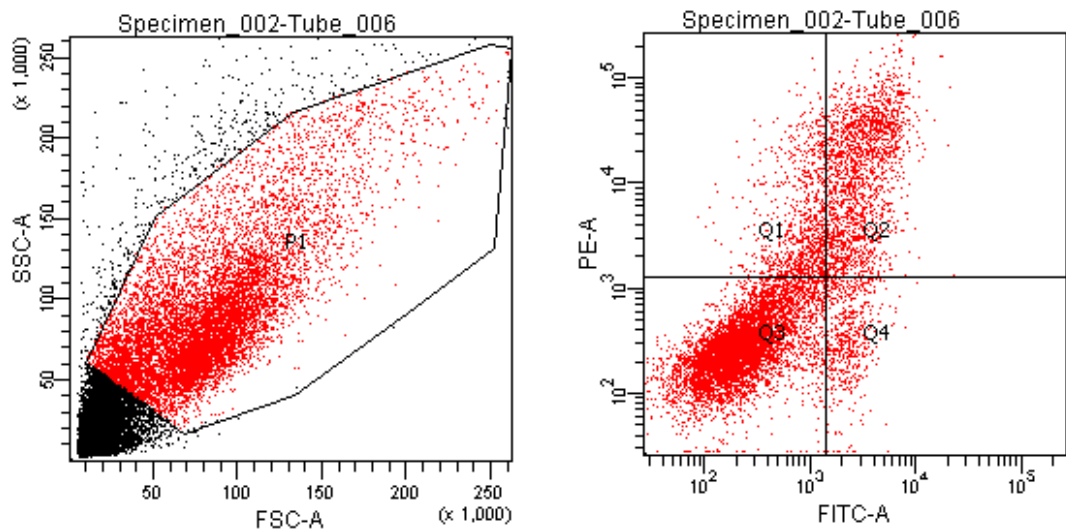

|                  |         |                                      |        |        |
|------------------|---------|--------------------------------------|--------|--------|
| Experiment Name: |         | HUVEC Ran                            |        |        |
| Specimen Name:   |         | Specimen_002                         |        |        |
| Tube Name:       |         | Tube_006                             |        |        |
| Record Date:     |         | Jun 19, 2024 11:06:08 AM             |        |        |
| \$OP:            |         | Administrator                        |        |        |
| GUID:            |         | 45b18299-6f8f-40eb-bb80-3d0a0aa8e0f9 |        |        |
|                  |         |                                      | FITC-A | PE-A   |
| Population       | #Events | %Parent                              | Mean   | Mean   |
| <div></div> P1   | 10,000  | 30.5                                 | 1,146  | 5,552  |
| <div></div> Q1   | 900     | 9.0                                  | 881    | 8,015  |
| <div></div> Q2   | 2,035   | 20.3                                 | 3,550  | 22,585 |
| <div></div> Q3   | 6,455   | 64.6                                 | 296    | 319    |
| <div></div> Q4   | 610     | 6.1                                  | 2,509  | 471    |

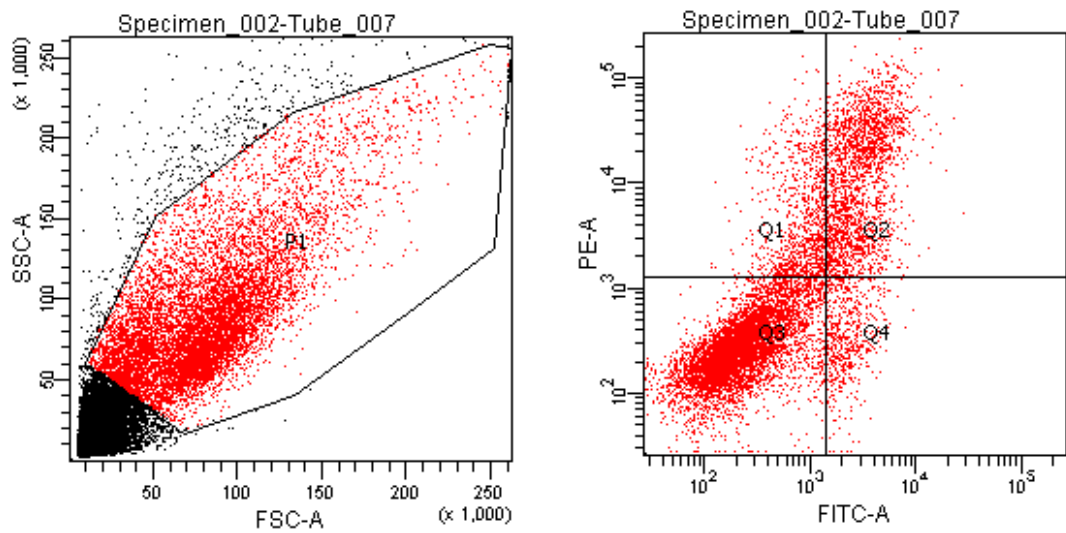

|                                            |         |         |             |           |  |
|--------------------------------------------|---------|---------|-------------|-----------|--|
| Experiment Name: HUVEC Ran                 |         |         |             |           |  |
| Specimen Name: Specimen_002                |         |         |             |           |  |
| Tube Name: Tube_007                        |         |         |             |           |  |
| Record Date: Jun 19, 2024 11:08:03 AM      |         |         |             |           |  |
| SOP: Administrator                         |         |         |             |           |  |
| GUID: 71e80ad3-475e-4251-8f7d-26e2a3a8d9e9 |         |         |             |           |  |
| Population                                 | #Events | %Parent | FITC-A Mean | PE-A Mean |  |
| ■ P1                                       | 10,000  | 29.8    | 1,159       | 5,556     |  |
| ▣ Q1                                       | 873     | 8.7     | 867         | 8,362     |  |
| ▣ Q2                                       | 2,113   | 21.1    | 3,543       | 21,764    |  |
| ▣ Q3                                       | 6,410   | 64.1    | 292         | 311       |  |
| ▣ Q4                                       | 604     | 6.0     | 2,443       | 468       |  |

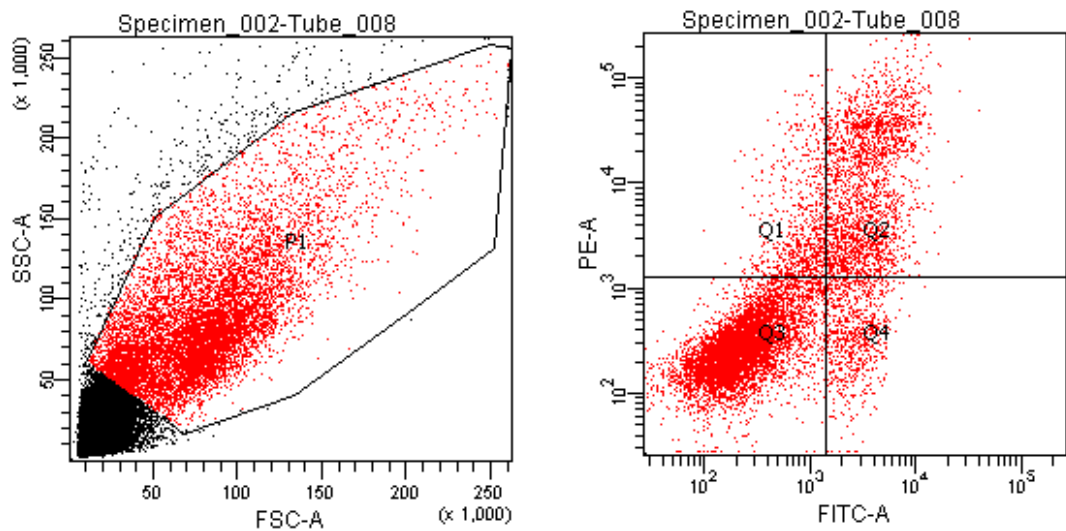

|                                                                                     |    |                                     |        |       |        |
|-------------------------------------------------------------------------------------|----|-------------------------------------|--------|-------|--------|
| Experiment Name:                                                                    |    | HUVEC Ran                           |        |       |        |
| Specimen Name:                                                                      |    | Specimen_002                        |        |       |        |
| Tube Name:                                                                          |    | Tube_008                            |        |       |        |
| Record Date:                                                                        |    | Jun 19, 2024 11:11:19 AM            |        |       |        |
| \$OP:                                                                               |    | Administrator                       |        |       |        |
| GUID:                                                                               |    | 75ebddd0-b1d5-4af0-ae9-a43c086035f8 |        |       |        |
|                                                                                     |    |                                     | FITC-A | PE-A  |        |
| Population                                                                          |    | #Events                             | Mean   | Mean  |        |
|  | P1 | 10,000                              | 28.9   | 1,463 | 5,511  |
|  | Q1 | 649                                 | 6.5    | 865   | 8,118  |
|  | Q2 | 2,288                               | 22.9   | 4,319 | 20,766 |
|  | Q3 | 6,231                               | 62.3   | 293   | 309    |
|  | Q4 | 832                                 | 8.3    | 2,843 | 492    |

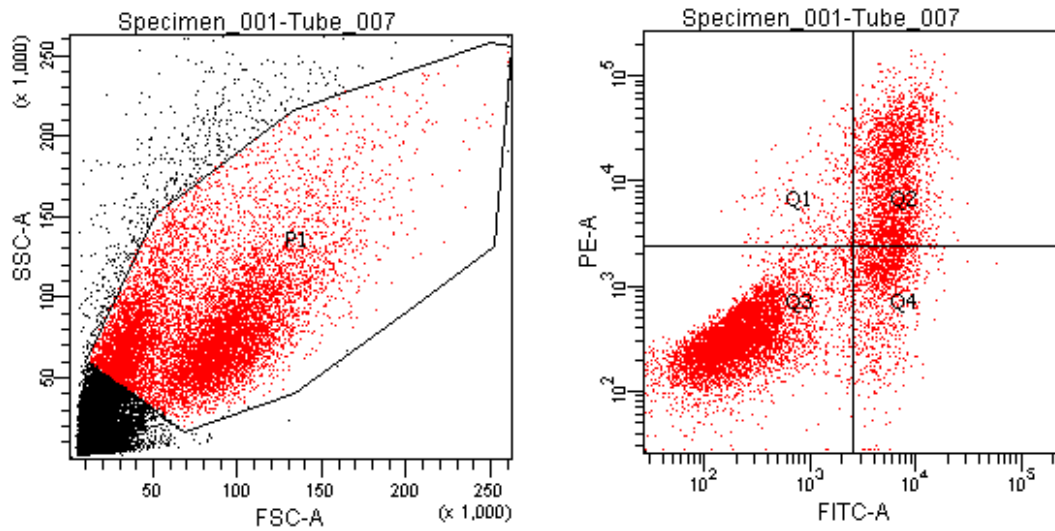

Experiment Name: HUVEC Ran  
 Specimen Name: Specimen\_001  
 Tube Name: Tube\_007  
 Record Date: Jun 14, 2024 11:43:01 AM  
 \$OP: Administrator  
 GUID: 202ea88f-1d38-439f-9bd4-ea46c94e3b7c

| Population                                                                                          | #Events | %Parent | FITC-A<br>Mean | PE-A<br>Mean |
|-----------------------------------------------------------------------------------------------------|---------|---------|----------------|--------------|
| <span style="color: red;">■</span> P1                                                               | 10,581  | 30.1    | 2,488          | 4,664        |
| <span style="border: 1px solid black; display: inline-block; width: 10px; height: 10px;"></span> Q1 | 236     | 2.2     | 1,382          | 9,648        |
| <span style="border: 1px solid black; display: inline-block; width: 10px; height: 10px;"></span> Q2 | 2,427   | 22.9    | 7,076          | 17,765       |
| <span style="border: 1px solid black; display: inline-block; width: 10px; height: 10px;"></span> Q3 | 6,757   | 63.9    | 315            | 374          |
| <span style="border: 1px solid black; display: inline-block; width: 10px; height: 10px;"></span> Q4 | 1,161   | 11.0    | 5,767          | 1,229        |



FACSDiva Version 6.2

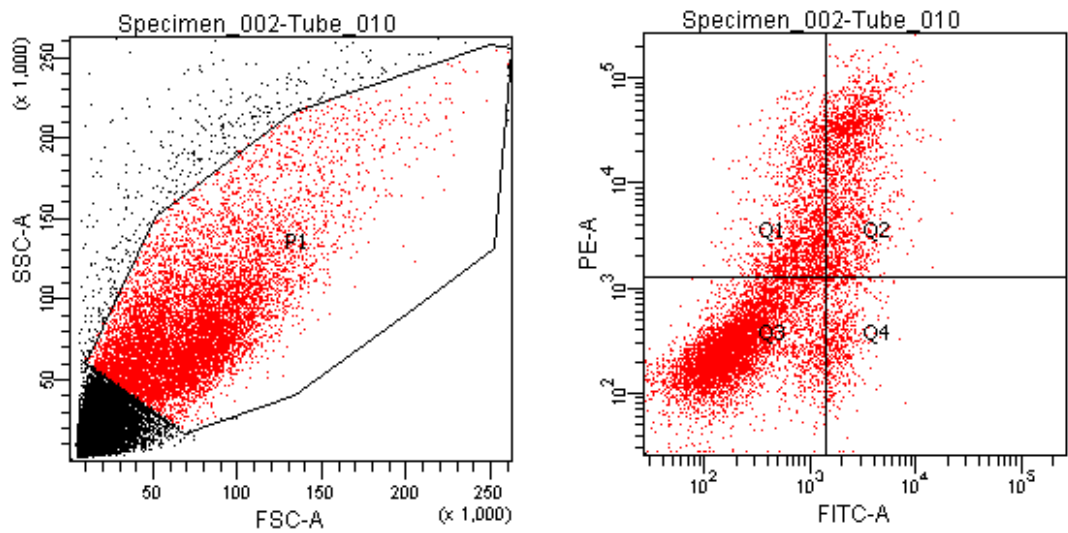

|                                            |         |         |                |              |
|--------------------------------------------|---------|---------|----------------|--------------|
| Experiment Name: HUVEC Ran                 |         |         |                |              |
| Specimen Name: Specimen_002                |         |         |                |              |
| Tube Name: Tube_010                        |         |         |                |              |
| Record Date: Jun 19, 2024 11:17:02 AM      |         |         |                |              |
| SOP: Administrator                         |         |         |                |              |
| GUID: 1e4e6fe5-68c0-4e9e-b310-15eaf0c157f7 |         |         |                |              |
| Population                                 | #Events | %Parent | FITC-A<br>Mean | PE-A<br>Mean |
| ■ P1                                       | 10,000  | 23.9    | 956            | 6,137        |
| ▣ Q1                                       | 1,461   | 14.6    | 845            | 8,736        |
| ▣ Q2                                       | 1,876   | 18.8    | 2,854          | 24,686       |
| ▣ Q3                                       | 6,086   | 60.9    | 283            | 331          |
| ▣ Q4                                       | 577     | 5.8     | 2,172          | 488          |

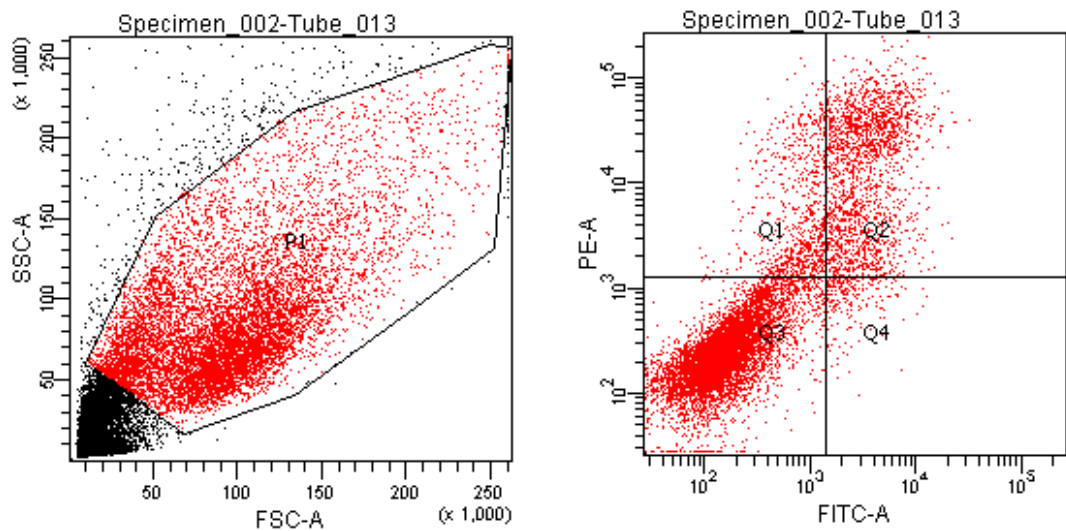

|                                            |         |         |                |              |
|--------------------------------------------|---------|---------|----------------|--------------|
| Experiment Name: HUVEC Ran                 |         |         |                |              |
| Specimen Name: Specimen_002                |         |         |                |              |
| Tube Name: Tube_013                        |         |         |                |              |
| Record Date: Jun 19, 2024 11:22:15 AM      |         |         |                |              |
| \$OP: Administrator                        |         |         |                |              |
| GUID: 63e66c09-cef3-45a7-8552-5f69d23135cd |         |         |                |              |
| Population                                 | #Events | %Parent | FITC-A<br>Mean | PE-A<br>Mean |
| ■ P1                                       | 10,000  | 39.3    | 1,129          | 6,195        |
| ☒ Q1                                       | 738     | 7.4     | 842            | 10,891       |
| ☒ Q2                                       | 2,009   | 20.1    | 4,231          | 25,743       |
| ☒ Q3                                       | 6,999   | 70.0    | 204            | 284          |
| ☒ Q4                                       | 254     | 2.5     | 2,921          | 835          |

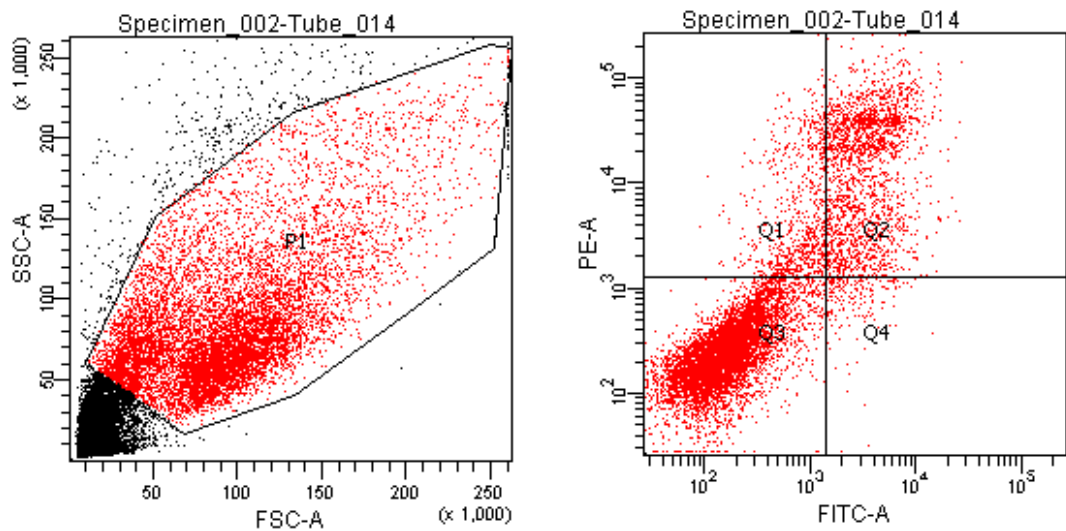

|                  |         |                                      |        |        |
|------------------|---------|--------------------------------------|--------|--------|
| Experiment Name: |         | HUVEC Ran                            |        |        |
| Specimen Name:   |         | Specimen_002                         |        |        |
| Tube Name:       |         | Tube_014                             |        |        |
| Record Date:     |         | Jun 19, 2024 11:23:54 AM             |        |        |
| \$OP:            |         | Administrator                        |        |        |
| GUID:            |         | 42003b6b-398b-48a9-a4af-d3c82adabab2 |        |        |
|                  |         |                                      | FITC-A | PE-A   |
| Population       | #Events | %Parent                              | Mean   | Mean   |
| <div></div> P1   | 10,000  | 38.9                                 | 1,176  | 6,476  |
| <div></div> Q1   | 723     | 7.2                                  | 841    | 10,537 |
| <div></div> Q2   | 2,095   | 21.0                                 | 4,284  | 26,245 |
| <div></div> Q3   | 6,942   | 69.4                                 | 205    | 282    |
| <div></div> Q4   | 240     | 2.4                                  | 3,132  | 846    |

FACSDiva Version 6.2

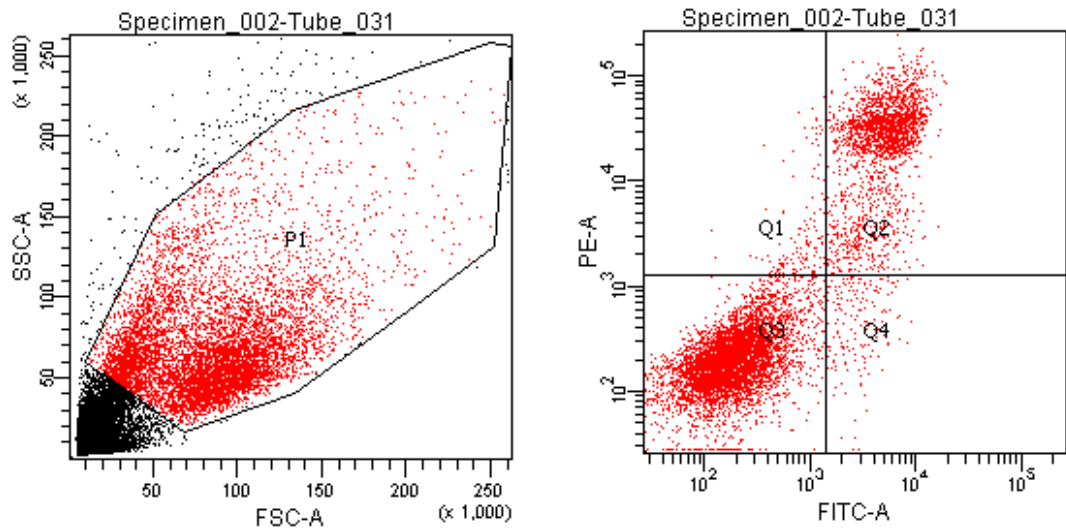

|                                            |         |         |             |           |
|--------------------------------------------|---------|---------|-------------|-----------|
| Experiment Name: HUVEC Ran                 |         |         |             |           |
| Specimen Name: Specimen_002                |         |         |             |           |
| Tube Name: Tube_031                        |         |         |             |           |
| Record Date: Jun 19, 2024 12:22:52 PM      |         |         |             |           |
| SOP: Administrator                         |         |         |             |           |
| GUID: 1da963d1-2cb0-403c-be22-41a79b3d3467 |         |         |             |           |
| Population                                 | #Events | %Parent | FITC-A Mean | PE-A Mean |
| ■ P1                                       | 7,470   | 25.4    | 1,824       | 9,034     |
| ☒ Q1                                       | 127     | 1.7     | 871         | 7,415     |
| ☒ Q2                                       | 2,050   | 27.4    | 5,734       | 31,845    |
| ☒ Q3                                       | 5,120   | 68.5    | 238         | 228       |
| ☒ Q4                                       | 173     | 2.3     | 3,163       | 541       |

## FACSDiva Version 6.2

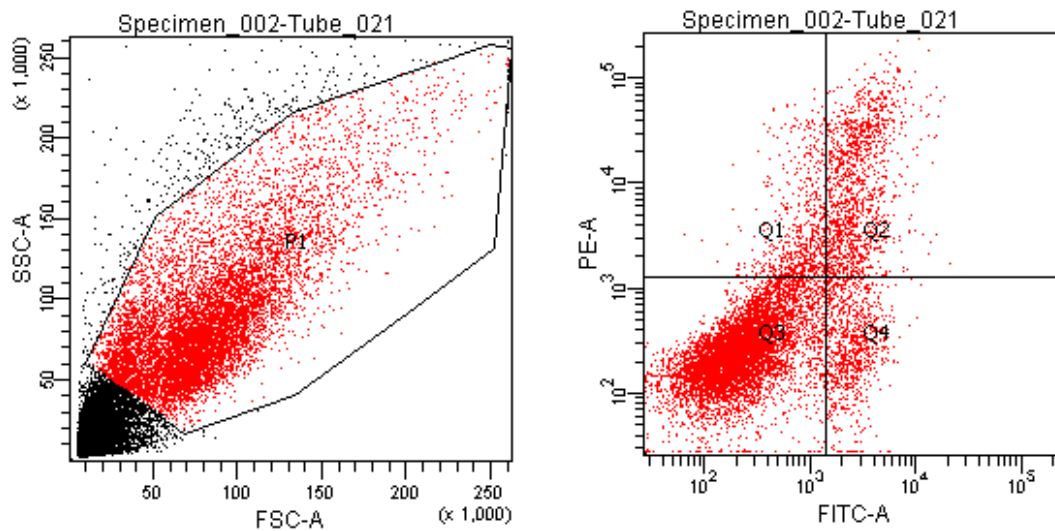

Experiment Name: HUVEC Ran  
Specimen Name: Specimen\_002  
Tube Name: Tube\_021  
Record Date: Jun 19, 2024 11:54:41 AM  
\$OP: Administrator  
GUID: fe80a29e-4baa-4258-94ca-e1ea3dc2de9c

| Population                                                                             | #Events | %Parent | FITC-A<br>Mean | PE-A<br>Mean |
|----------------------------------------------------------------------------------------|---------|---------|----------------|--------------|
|  P1 | 10,000  | 31.1    | 988            | 3,292        |
|  Q1 | 604     | 6.0     | 869            | 6,917        |
|  Q2 | 1,436   | 14.4    | 3,280          | 18,340       |
|  Q3 | 6,997   | 70.0    | 292            | 291          |
|  Q4 | 963     | 9.6     | 2,701          | 388          |

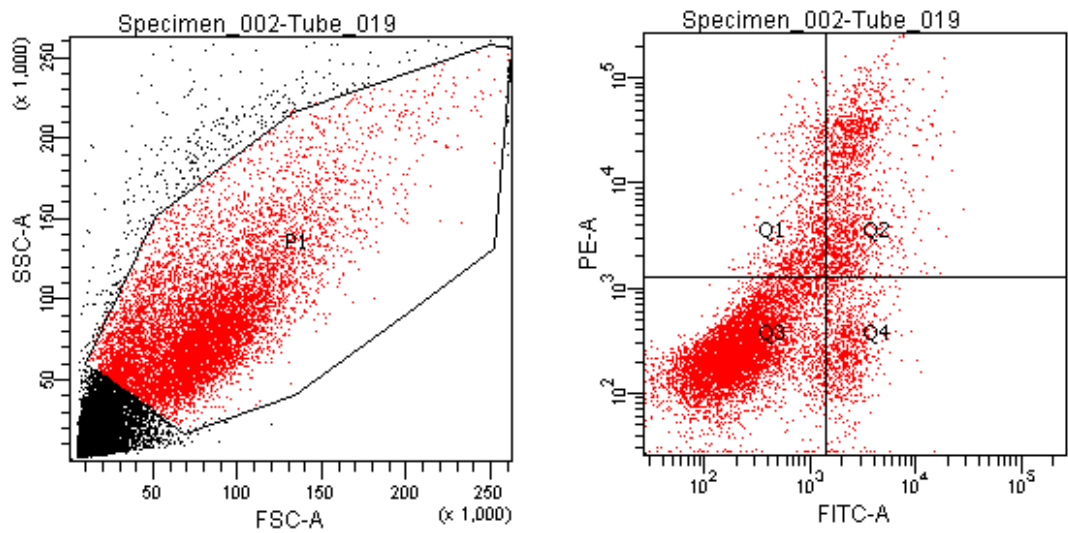

|                                            |         |         |                |              |
|--------------------------------------------|---------|---------|----------------|--------------|
| Experiment Name: HUVEC Ran                 |         |         |                |              |
| Specimen Name: Specimen_002                |         |         |                |              |
| Tube Name: Tube_019                        |         |         |                |              |
| Record Date: Jun 19, 2024 11:49:47 AM      |         |         |                |              |
| SOP: Administrator                         |         |         |                |              |
| GUID: 15ea5490-f81d-44b9-b735-5e5eccfd545b |         |         |                |              |
| Population                                 | #Events | %Parent | FITC-A<br>Mean | PE-A<br>Mean |
| ■ P1                                       | 10,000  | 30.3    | 975            | 4,007        |
| ▣ Q1                                       | 750     | 7.5     | 897            | 8,376        |
| ▣ Q2                                       | 1,517   | 15.2    | 3,202          | 20,726       |
| ▣ Q3                                       | 6,833   | 68.3    | 284            | 293          |
| ▣ Q4                                       | 900     | 9.0     | 2,532          | 384          |

FACSDiva Version 6.2

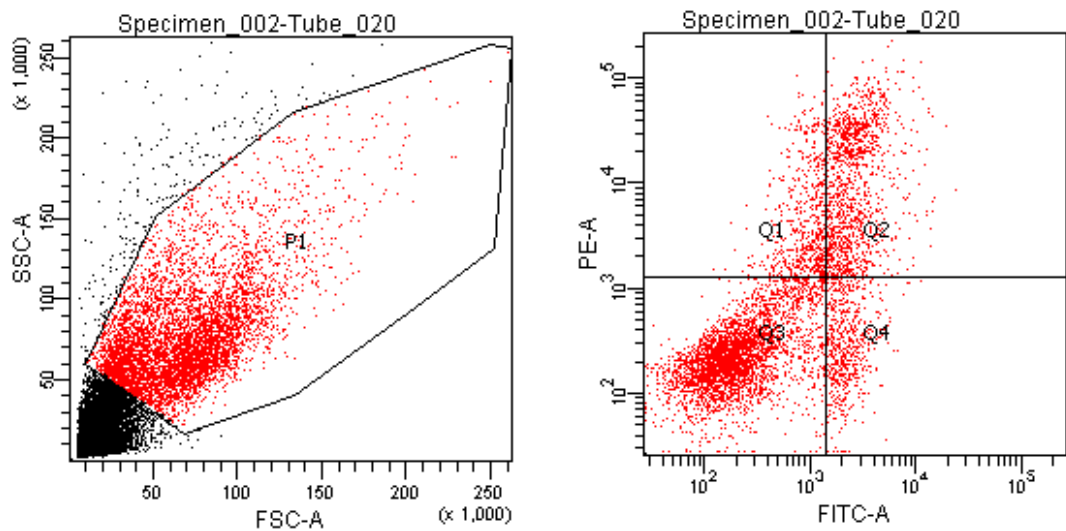

|                                            |         |         |             |           |
|--------------------------------------------|---------|---------|-------------|-----------|
| Experiment Name: HUVEC Ran                 |         |         |             |           |
| Specimen Name: Specimen_002                |         |         |             |           |
| Tube Name: Tube_020                        |         |         |             |           |
| Record Date: Jun 19, 2024 11:52:37 AM      |         |         |             |           |
| \$OP: Administrator                        |         |         |             |           |
| GUID: d8b71a8c-5c2c-49d2-9da7-ce820dec3bb5 |         |         |             |           |
| Population                                 | #Events | %Parent | FITC-A Mean | PE-A Mean |
| ■ P1                                       | 5,957   | 19.2    | 1,183       | 5,329     |
| ☒ Q1                                       | 546     | 9.2     | 930         | 8,624     |
| ☒ Q2                                       | 1,313   | 22.0    | 3,086       | 19,659    |
| ☒ Q3                                       | 3,473   | 58.3    | 283         | 279       |
| ☒ Q4                                       | 625     | 10.5    | 2,410       | 406       |

# FACSDiva Version 6.2

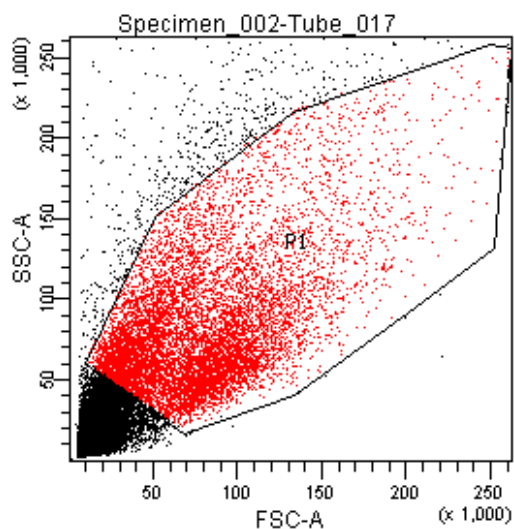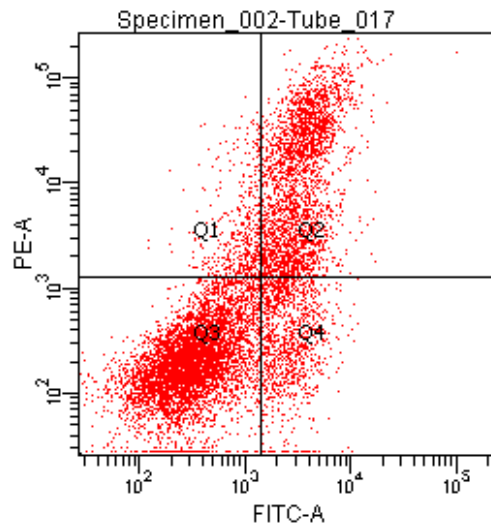

Experiment Name: HUVEC Ran  
 Specimen Name: Specimen\_002  
 Tube Name: Tube\_017  
 Record Date: Jun 19, 2024 11:43:22 AM  
 \$OP: Administrator  
 GUID: 591b3d49-c808-47ef-bd74-dc3464f56e71

| Population                             | #Events | %Parent | FITC-A<br>Mean | PE-A<br>Mean |
|----------------------------------------|---------|---------|----------------|--------------|
| <span style="color: red;">■</span> P1  | 10,000  | 34.3    | 1,697          | 6,771        |
| <span style="color: gray;">⊠</span> Q1 | 436     | 4.4     | 943            | 5,922        |
| <span style="color: gray;">⊠</span> Q2 | 2,726   | 27.3    | 3,981          | 23,164       |
| <span style="color: gray;">⊠</span> Q3 | 5,647   | 56.5    | 396            | 250          |
| <span style="color: gray;">⊠</span> Q4 | 1,191   | 11.9    | 2,917          | 479          |



# FACSDiva Version 6.2

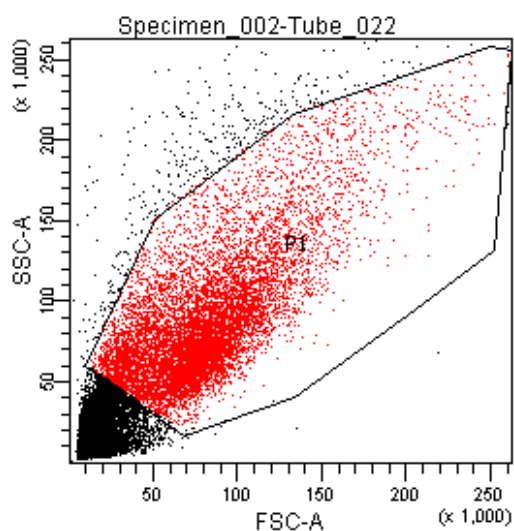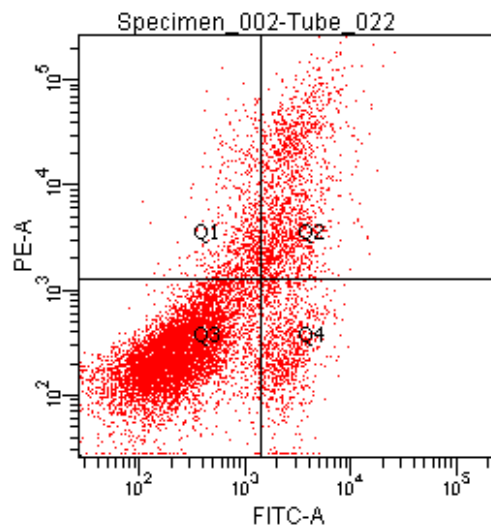

Experiment Name: HUVEC Ran  
 Specimen Name: Specimen\_002  
 Tube Name: Tube\_022  
 Record Date: Jun 19, 2024 11:56:25 AM  
 \$OP: Administrator  
 GUID: 030541b9-7256-4382-9287-ad42feb3e74b

| Population                              | #Events | %Parent | FITC-A<br>Mean | PE-A<br>Mean |
|-----------------------------------------|---------|---------|----------------|--------------|
| <span style="color: red;">■</span> P1   | 10,000  | 31.0    | 1,010          | 3,555        |
| <span style="color: black;">■</span> Q1 | 585     | 5.9     | 928            | 7,364        |
| <span style="color: black;">■</span> Q2 | 1,478   | 14.8    | 3,354          | 19,505       |
| <span style="color: black;">■</span> Q3 | 6,989   | 69.9    | 293            | 291          |
| <span style="color: black;">■</span> Q4 | 948     | 9.5     | 2,697          | 407          |

# FACSDiva Version 6.2

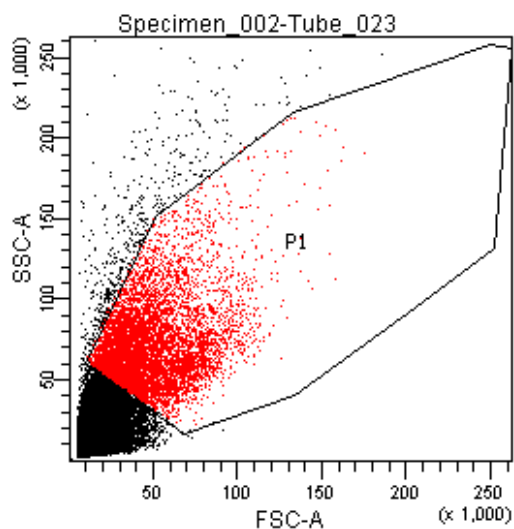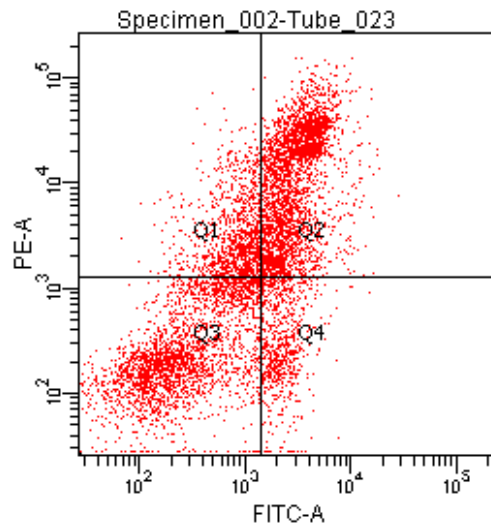

Experiment Name: HUVEC Ran  
 Specimen Name: Specimen\_002  
 Tube Name: Tube\_023  
 Record Date: Jun 19, 2024 12:03:49 PM  
 \$OP: Administrator  
 GUID: dcad897e-ad53-4c93-a111-331c92c66930

| Population                            | #Events | %Parent | FITC-A<br>Mean | PE-A<br>Mean |
|---------------------------------------|---------|---------|----------------|--------------|
| <span style="color: red;">■</span> P1 | 7,771   | 10.4    | 2,000          | 8,690        |
| <span style="color: red;">⊠</span> Q1 | 1,056   | 13.6    | 873            | 4,853        |
| <span style="color: red;">⊠</span> Q2 | 3,277   | 42.2    | 3,560          | 18,645       |
| <span style="color: red;">⊠</span> Q3 | 2,636   | 33.9    | 377            | 352          |
| <span style="color: red;">⊠</span> Q4 | 802     | 10.3    | 2,441          | 469          |

FACSDiva Version 6.2

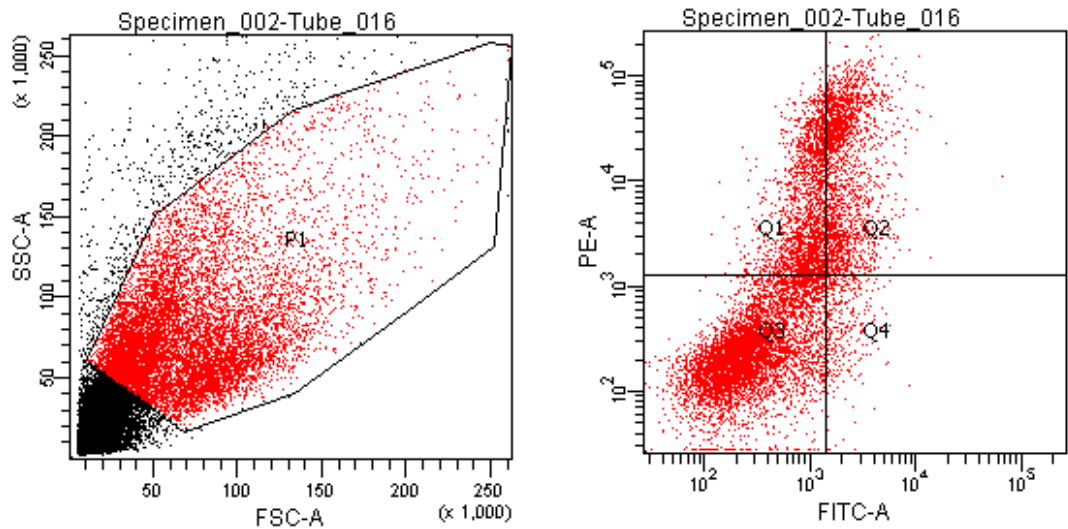

Experiment Name: HUVEC Ran  
Specimen Name: Specimen\_002  
Tube Name: Tube\_016  
Record Date: Jun 19, 2024 11:40:43 AM  
\$OP: Administrator  
GUID: be262391-9780-4cd9-8c09-6e947a5cb1bf

| Population     | #Events | %Parent | FITC-A<br>Mean | PE-A<br>Mean |
|----------------|---------|---------|----------------|--------------|
| <div></div> P1 | 10,000  | 29.6    | 1,013          | 8,203        |
| <div></div> Q1 | 1,828   | 18.3    | 950            | 11,125       |
| <div></div> Q2 | 2,211   | 22.1    | 2,464          | 27,008       |
| <div></div> Q3 | 5,548   | 55.5    | 368            | 311          |
| <div></div> Q4 | 413     | 4.1     | 2,196          | 602          |

# FACSDiva Version 6.2

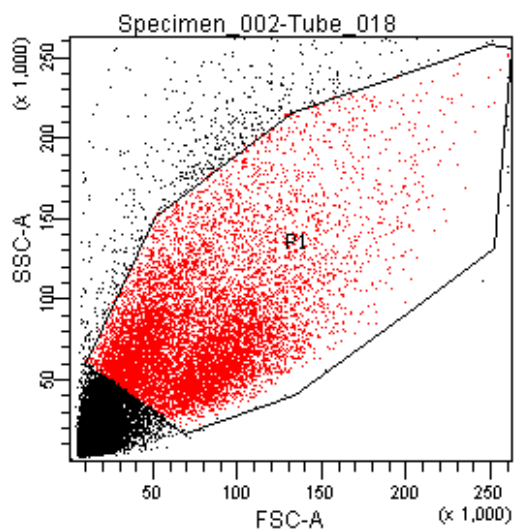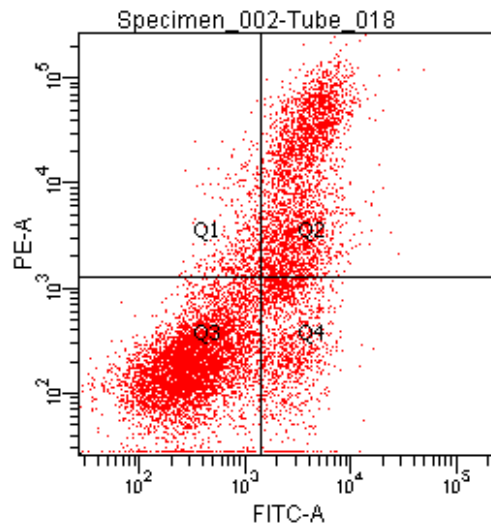

Experiment Name: HUVEC Ran  
 Specimen Name: Specimen\_002  
 Tube Name: Tube\_018  
 Record Date: Jun 19, 2024 11:45:50 AM  
 \$OP: Administrator  
 GUID: 24f3823a-1e82-4726-8982-bf732bbd162c

| Population                             | #Events | %Parent | FITC-A<br>Mean | PE-A<br>Mean |
|----------------------------------------|---------|---------|----------------|--------------|
| <span style="color: red;">■</span> P1  | 10,000  | 32.0    | 1,855          | 7,158        |
| <span style="color: gray;">⊠</span> Q1 | 370     | 3.7     | 932            | 4,776        |
| <span style="color: gray;">⊠</span> Q2 | 2,889   | 28.9    | 4,194          | 23,484       |
| <span style="color: gray;">⊠</span> Q3 | 5,426   | 54.3    | 402            | 241          |
| <span style="color: gray;">⊠</span> Q4 | 1,315   | 13.2    | 2,967          | 502          |

# FACSDiva Version 6.2

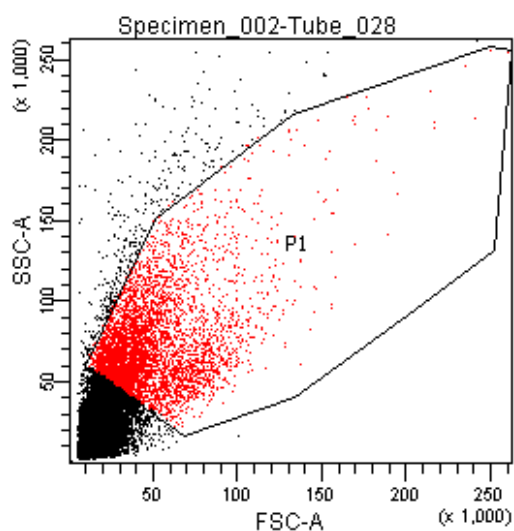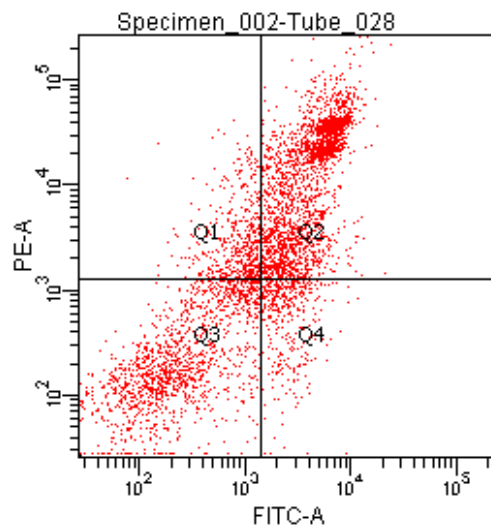

Experiment Name: HUVEC Ran  
 Specimen Name: Specimen\_002  
 Tube Name: Tube\_028  
 Record Date: Jun 19, 2024 12:16:10 PM  
 \$OP: Administrator  
 GUID: 67a0152b-52fe-488f-984e-f6a3dfd1f3e7

| Population                             | #Events | %Parent | FITC-A<br>Mean | PE-A<br>Mean |
|----------------------------------------|---------|---------|----------------|--------------|
| <span style="color: red;">■</span> P1  | 4,628   | 9.6     | 2,951          | 11,196       |
| <span style="color: gray;">⊠</span> Q1 | 433     | 9.4     | 904            | 4,407        |
| <span style="color: gray;">⊠</span> Q2 | 2,329   | 50.3    | 4,931          | 21,081       |
| <span style="color: gray;">⊠</span> Q3 | 1,425   | 30.8    | 387            | 349          |
| <span style="color: gray;">⊠</span> Q4 | 441     | 9.5     | 2,790          | 704          |

FACSDiva Version 6.2

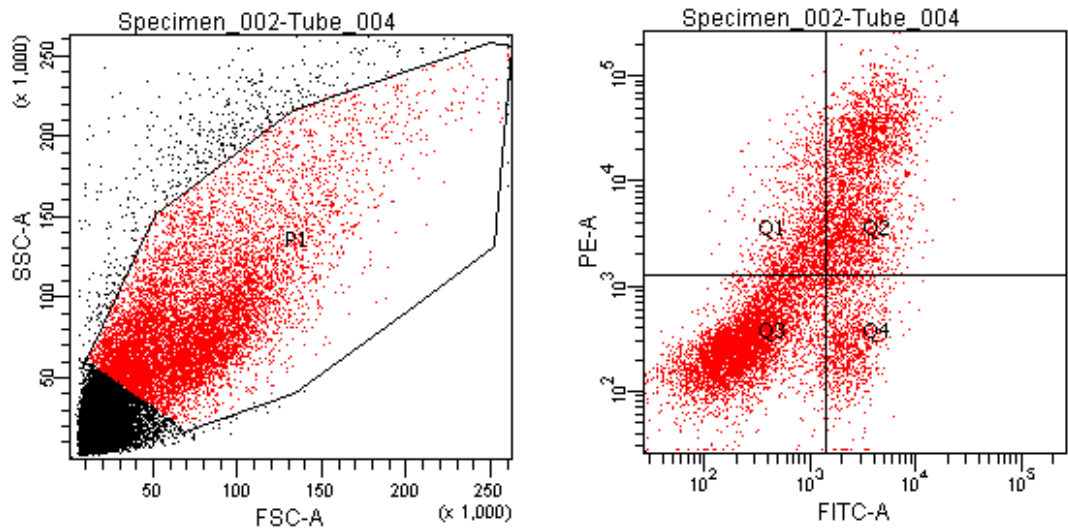

Experiment Name: HUVEC Ran  
Specimen Name: Specimen\_002  
Tube Name: Tube\_004  
Record Date: Jun 19, 2024 10:59:24 AM  
\$OP: Administrator  
GUID: b5a2f361-f286-4be0-8326-08c9d23bb943

| Population     | #Events | %Parent | FITC-A<br>Mean | PE-A<br>Mean |
|----------------|---------|---------|----------------|--------------|
| <div></div> P1 | 10,000  | 27.1    | 1,583          | 6,455        |
| <div></div> Q1 | 1,054   | 10.5    | 871            | 6,044        |
| <div></div> Q2 | 2,845   | 28.4    | 3,722          | 19,680       |
| <div></div> Q3 | 5,092   | 50.9    | 327            | 342          |
| <div></div> Q4 | 1,009   | 10.1    | 2,640          | 442          |

FACSDiva Version 6.2

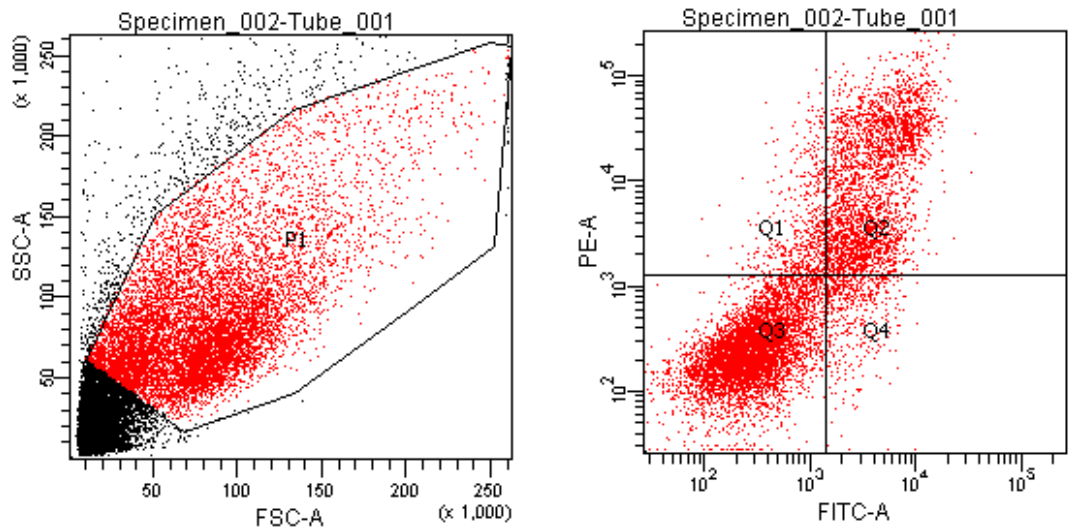

Experiment Name: HUVEC Ran  
Specimen Name: Specimen\_002  
Tube Name: Tube\_001  
Record Date: Jun 19, 2024 10:53:13 AM  
\$OP: Administrator  
GUID: fb0ad908-5a0c-4394-a13c-1a4d4ba81977

| Population                                                                             | #Events | %Parent | FITC-A<br>Mean | PE-A<br>Mean |
|----------------------------------------------------------------------------------------|---------|---------|----------------|--------------|
|  P1 | 10,000  | 36.4    | 1,963          | 6,757        |
|  Q1 | 529     | 5.3     | 916            | 7,279        |
|  Q2 | 2,998   | 30.0    | 5,138          | 20,552       |
|  Q3 | 5,930   | 59.3    | 355            | 292          |
|  Q4 | 543     | 5.4     | 3,009          | 695          |

# FACSDiva Version 6.2

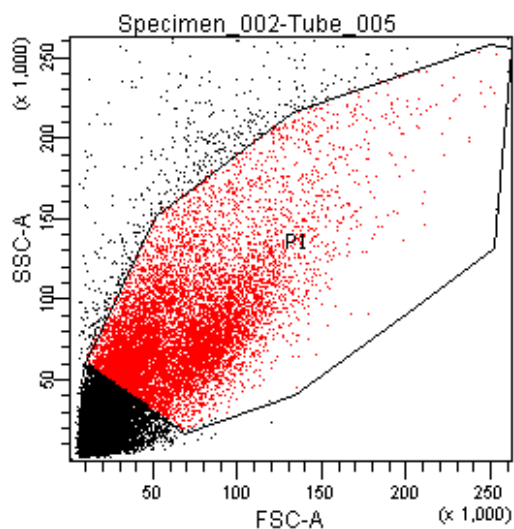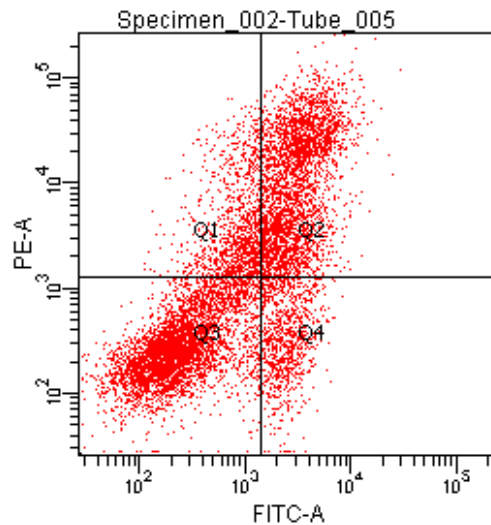

Experiment Name: HUVEC Ran  
 Specimen Name: Specimen\_002  
 Tube Name: Tube\_005  
 Record Date: Jun 19, 2024 11:03:57 AM  
 \$OP: Administrator  
 GUID: 8789749f-3e89-4d74-96fc-ddbda76e18ed

| Population                             | #Events | %Parent | FITC-A<br>Mean | PE-A<br>Mean |
|----------------------------------------|---------|---------|----------------|--------------|
| <span style="color: red;">■</span> P1  | 10,000  | 20.1    | 1,745          | 7,155        |
| <span style="color: gray;">⊠</span> Q1 | 1,112   | 11.1    | 885            | 6,536        |
| <span style="color: gray;">⊠</span> Q2 | 3,357   | 33.6    | 3,640          | 18,551       |
| <span style="color: gray;">⊠</span> Q3 | 4,471   | 44.7    | 327            | 336          |
| <span style="color: gray;">⊠</span> Q4 | 1,060   | 10.6    | 2,628          | 471          |
