# Supplementary material for: Mechanistic Study on the Active Components of Bawei Longzuan Granules in Inhibiting Neovascularization
Source: Research Square preprint supplement (doi:10.21203/rs.3.rs-6266056/v1), 2025-05-30
Supplement: Supplementary file 3 [file Statistical value.xlsx]

## Sheet: Sheet1
	1	1	/GAPDH				1	1	/GAPDH				1	1	/GAPDH
空白组	6534.57	18333	0.356437			空白组	16691.7	20279.6	0.823077			空白组	11982.2	18317	0.654158
VEGF165组	23971.1	17829.2	1.34449			VEGF165组	37973.2	20997.9	1.80843			VEGF165组	38492.1	17817.2	2.16039
贝伐珠单抗组	14972.4	18313.8	0.817546			贝伐珠单抗组	17080.3	19114.8	0.893562			贝伐珠单抗组	18699.1	18407.9	1.01582
木犀草素组	7255.86	16248.8	0.446549			甘草素组	25108.2	18112.6	1.38623			柚皮素组	20555	16284.8	1.26222
	2	2					2	2					2	2
空白组	4204.86	15619.3	0.269209			空白组	11656.1	20245.6	0.575737			空白组	16277.3	15713.1	1.03591
VEGF165组	19389.9	15200.1	1.27564			VEGF165组	42487.9	19802.1	2.14563			VEGF165组	37170.9	15244.2	2.43836
贝伐珠单抗组	6022.57	15957.3	0.377418			贝伐珠单抗组	18257.3	16092.3	1.13454			贝伐珠单抗组	23818.9	15951.6	1.4932
木犀草素组	6749.4	16406.8	0.411379			甘草素组	14080.8	17461.7	0.80638			柚皮素组	27406.3	16234.8	1.68812
	3	3					3	3					3	3
空白组	10937.6	15826.7	0.691087			空白组	24551.3	18098.4	1.35654			空白组	13230	16775.5	0.788647
VEGF165组	17932.1	14781.7	1.21313			VEGF165组	45592.9	22485.5	2.02765			VEGF165组	43336	17036	2.54379
贝伐珠单抗组	13630.8	13770.8	0.989834			贝伐珠单抗组	29926.2	18977	1.57698			贝伐珠单抗组	23527.6	13626.6	1.72659
木犀草素组	12339.9	14512.7	0.850283			甘草素组	23737.2	18084.6	1.31256			柚皮素组	14270.6	13593.2	1.04983
好		GAPDH				差		GAPDH				最好		GAPDH
	空白组	VEGF165组	贝伐珠单抗组	木犀草素组
1	0.356437	1.34449	0.817546	0.446549
2	0.269209	1.27564	0.377418	0.411379
3	0.691087	1.21313	0.989834	0.850283
均值	0.438911	1.27775	0.728266	0.569403
标准差	0.181836	0.0536476	0.257865	0.19913
