# Supplementary material for: Mechanistic Study on the Active Components of Bawei Longzuan Granules in Inhibiting Neovascularization
Source: Research Square preprint supplement (doi:10.21203/rs.3.rs-6266056/v1), 2025-05-30
Supplement: Supplementary file 4 [file Statistical value.xlsx]

## Sheet: Sheet1
	1	gapdh		/gapdh
低	9822.93	21612.4		0.454504		0.454504	0.418069	0.384989
低	3575.15	21306.3		0.167798		0.167798	0.415009	0.598042
高	17207.2	16532.5		1.04081		1.04081	0.768617	0.863323
	2
低	7797.57	18651.4		0.418069
低	7457.05	17968.4		0.415009
高	16961.9	22068.1		0.768617
	3
低	6834.33	17752		0.384989
低	12640.1	21135.8		0.598042
高	18446.8	21367.2		0.863323
