# Supplementary material for: Mechanistic Study on the Active Components of Bawei Longzuan Granules in Inhibiting Neovascularization
Source: Research Square preprint supplement (doi:10.21203/rs.3.rs-6266056/v1), 2025-05-30
Supplement: Supplementary file 5 [file Statistical value.xlsx]

## Sheet: Sheet1
	1	gapdh		/gapdh
低	8072.28	20853.8		0.387088
高	18996.5	20469.9		0.928019		0.387088	0.196748	0.194502
低	6748.64	19983.5		0.337711		0.928019	1.23998	1.38153
						0.337711	0.786554	0.577672
	2	gapdh
低	3807.84	19353.9		0.196748
高	22638.6	18257.2		1.23998
低	13966.3	17756.3		0.786554
	3	gapdh
低	3110.13	15990.2		0.194502
高	21616.8	15647.1		1.38153
低	9246.1	16005.8		0.577672
