# Supplementary figures and images for: Mechanistic Study on the Active Components of Bawei Longzuan Granules in Inhibiting Neovascularization
Source: Research Square preprint supplement (doi:10.21203/rs.3.rs-6266056/v1), 2025-05-30

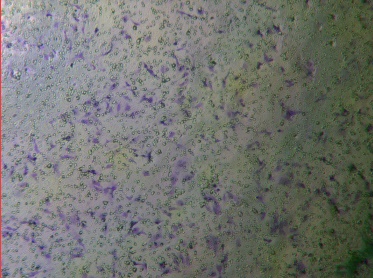

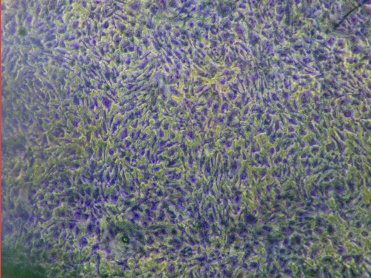

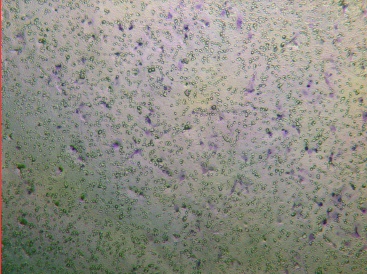


正常组（5.31-03） 模型组（5.26-05） 对照组（5.31-04）


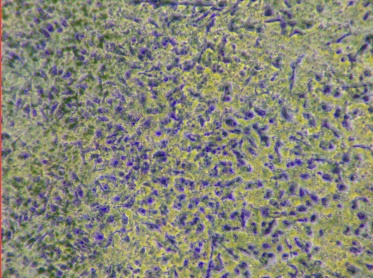

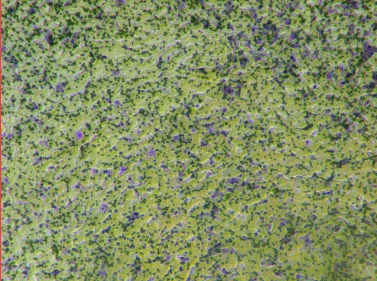

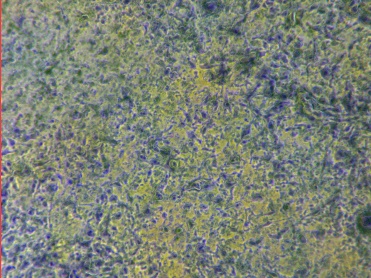


（甘草素）（5.26-24） 柚皮素（5.26-16） 木犀草素（5.26-08）

| 分组 | 剂量 | 迁移数 |
| --- | --- | --- |
| 正常组 |  | 268.00±57.15 |
| 模型组 |  | 407.33±42.72# |
| 对照组 |  | 214.33±41.70** |
| 甘草素 |  | 256.00±29.39* |
| 柚皮素 |  | 160.67±13.27** |
| 木犀草素 |  | 216.00±35.28** |

注：与模型组相比，**P*＜0.05，** *P*＜0.01；与正常组相比，#*P*＜0.05，## *P*＜0.01

柱状图


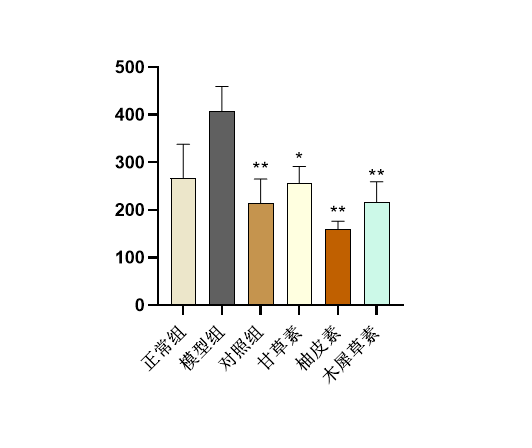

Supplement: Supplementary file 2 [file transwell picture.docx]
